# Supplementary material for: Highly enantioselective Michael addition reactions of 2-substituted benzofuran-3(2H)-ones to nitroolefins
Source: Royal Society of Chemistry journal article supplement (doi:10.1039/c5ob01691f), 2015-01-01
Supplement: c5ob01691f1.pdf [file c5ob01691f1.pdf]

## Highly Enantioselective Michael Addition Reactions of 2-Substituted Benzofuran-3(2*H*)-ones to Nitroolefins

Zhi-Pei Zhang,<sup>a,b</sup> Nan Dong,<sup>a,b</sup> Xin Li<sup>a,b,\*</sup> and Jin-Pei Cheng<sup>b,c</sup>

---

<sup>a</sup> State Key Laboratory of Elemento-Organic Chemistry, Department of Chemistry, Nankai University, Tianjin 300071. <sup>b</sup> Collaborative Innovation Center of Chemical Science and Engineering, Tianjin 300071. <sup>c</sup> Center of Basic Molecular Science, Department of Chemistry, Tsinghua University, Beijing 100084.

## Electronic Supplementary Information

### Table of Contents

|                                                                         |                 |
|-------------------------------------------------------------------------|-----------------|
| <b>1. General Information.....</b>                                      | <b>3</b>        |
| <b>2. General experimental Michael addition reaction procedure.....</b> | <b>4</b>        |
| <b>3. Datas, NMR copies and HPLC copies.....</b>                        | <b><u>5</u></b> |
| Compound 3a: .....                                                      | <u>5</u>        |
| Compound 3b: .....                                                      | 8               |
| Compound 3c: .....                                                      | 11              |
| Compound 3d: .....                                                      | 14              |
| Compound 3e: .....                                                      | 17              |
| Compound 3f:.....                                                       | 20              |
| Compound 3g: .....                                                      | 23              |
| Compound 3h: .....                                                      | 26              |
| Compound 3i: .....                                                      | 29              |
| Compound 3j:.....                                                       | 32              |
| Compound 3k: .....                                                      | 35              |
| Compound 3l: .....                                                      | 38              |
| Compound 3m:.....                                                       | 41              |
| Compound 3n:.....                                                       | 44              |
| Compound 3o: .....                                                      | 47              |
| Compound 3p:.....                                                       | 50              |
| Compound 3q: .....                                                      | 53              |
| Compound 3r: .....                                                      | 56              |
| <b>4. X-ray crystallography data of 3p.....</b>                         | <b>59</b>       |
| <b>5. Reference .....</b>                                               | <b>61</b>       |

**1. General Information:** Commercial reagents were used as received, unless otherwise stated.  $^1\text{H}$  and  $^{13}\text{C}$  NMR were recorded on 400 MHz spectrometer. Chemical shifts are reported in ppm from tetramethylsilane with the solvent resonance as the internal standard. The following abbreviations were used to designate chemical shift multiplicities: s = singlet, d = doublet, t = triplet, q = quartet, m = multiplet. All first-order splitting patterns were assigned on the basis of the appearance of the multiplet. Splitting patterns that could not be easily interpreted are designated as multiplet (m). Mass spectra were obtained using electrospray ionization (ESI) mass spectrometer. 2-Substituted benzofuran-3(2*H*)-ones were synthesized according to the literature procedure.<sup>1</sup> Nitroolefins were synthesized according to the literature procedure.<sup>2</sup>

## 2. General experimental Michael addition reaction procedure

To a stirred solution of 2-substituted benzofuran-3(2*H*)-one **1** (0.1 mmol) and **5c** (0.02 mmol) in dry CHCl<sub>3</sub> (0.5 mL) at room temperature was added nitroolefin **2** (0.12 mmol, 1.2 equiv). The reactions were monitored by TLC. After **1** was consumed, the reaction solution was concentrated *in vacuo* and the crude was purified by flash chromatography eluting with (petroleum ether/ethyl acetate 10:1) to afford the products **3**. The regioselectivity was determined by <sup>1</sup>H NMR spectroscopy of crude product. The *ee* values were determined by chiral HPLC analysis.

### 3. Datas, NMR copies and HPLC copies

**Compound 3a:** 2-(1-(4-methoxyphenyl)-2-nitroethyl)-2-methylbenzofuran-3(2H)-one

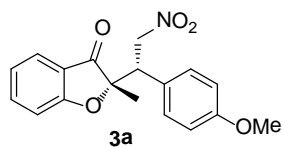

**Compound 3a:** yellow solid, 90% isolated yield.

**<sup>1</sup>H NMR** (400 MHz, CDCl<sub>3</sub>) δ 7.73 – 6.59 (m, 8H), 4.68 (dd, *J* = 12.9, 11.3 Hz, 1H), 4.34 (dd, *J* = 12.8, 4.2 Hz, 1H), 3.95 (dd, *J* = 11.3, 4.2 Hz, 1H), 3.78 (s, 2H), 3.65 (s, 1H), 1.51 (s, 1H), 1.25 (s, 2H).

**<sup>13</sup>C NMR** (100 MHz, CDCl<sub>3</sub>) δ 202.67 , 171.32 , 159.69 , 139.03 , 130.51 , 126.36 , 124.92 , 122.70 , 120.15 , 114.28 , 113.89 , 113.73 , 113.13 , 90.43 , 75.88 , 55.33 , 49.02 , 21.53 .

**HRMS (ESI)** calcd for C<sub>18</sub>H<sub>17</sub>NO<sub>5</sub> (M+Na)<sup>+</sup>: 350.1004, found: 350.1000.

**HPLC** The enantiomeric excess was determined by HPLC with an OD-H column at 210 nm (2-propanol: hexane=1:9), 1.0 mL/min; major isomer: *t*<sub>1</sub> = 12.98 min, *t*<sub>2</sub> = 17.94 min; minor isomer: *t*<sub>3</sub> = 16.61 min, *t*<sub>4</sub> = 20.68 min.

**[α]<sub>D</sub><sup>25</sup>** -51.8 (c = 0.8, CHCl<sub>3</sub>).

NMR copies of major product of compound **3a**

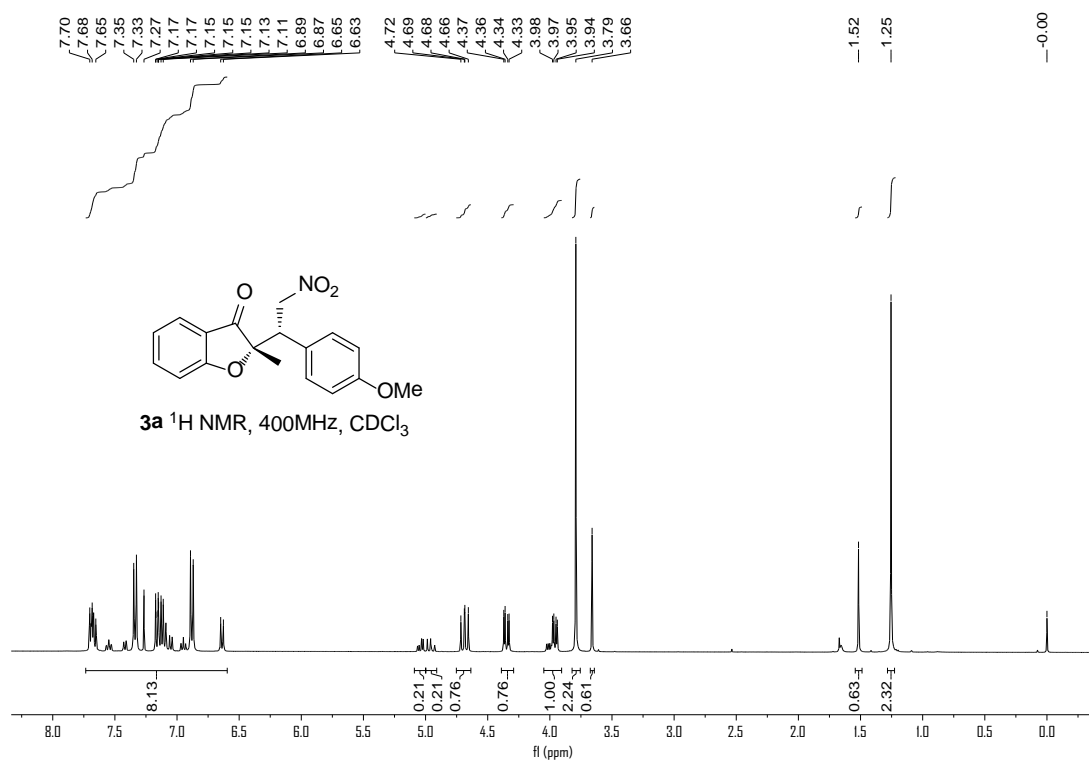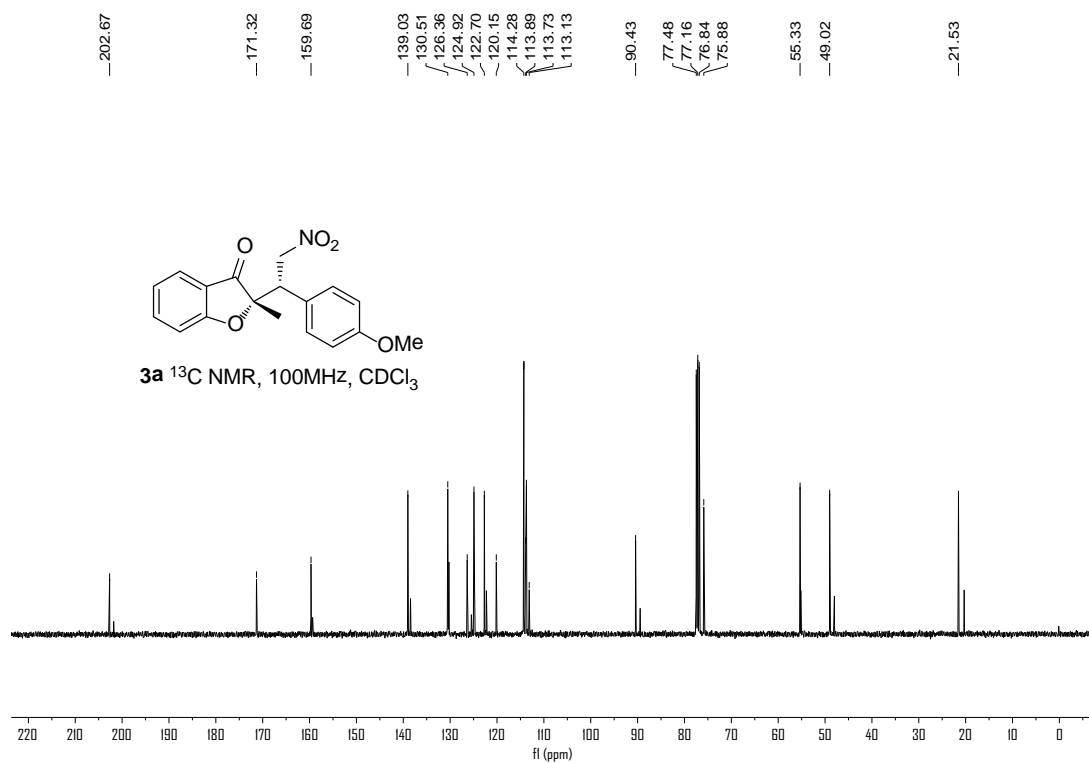

HPLC copies of compound 3a:

**rac iPrOH/Hex 1/9 OD-H**

<Chromatogram>

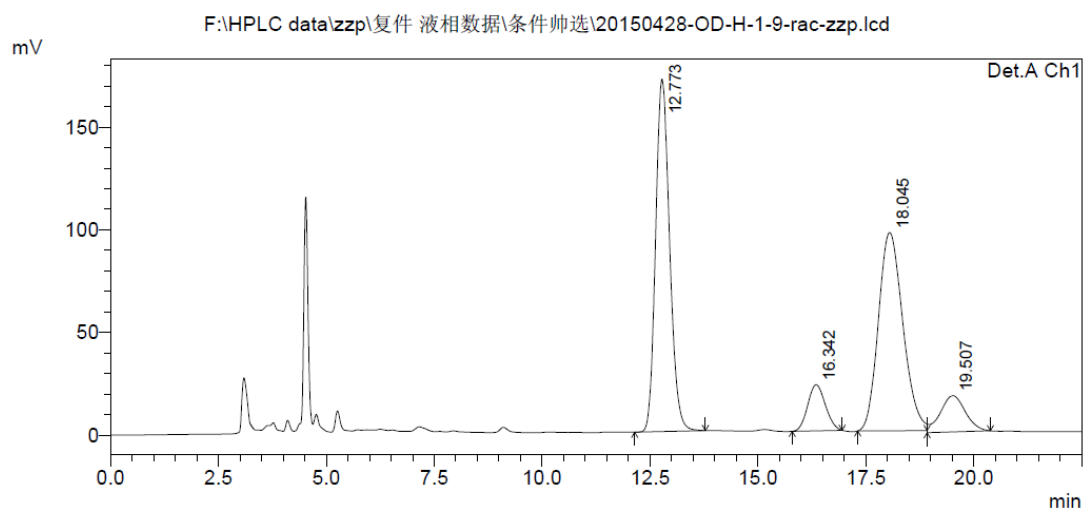

PeakTable

| Peak# | Ret. Time | Area    | Height | Area %  | Height % |
|-------|-----------|---------|--------|---------|----------|
| 1     | 12.773    | 3872608 | 171686 | 42.916  | 55.676   |
| 2     | 16.342    | 638232  | 22442  | 7.073   | 7.278    |
| 3     | 18.045    | 3797862 | 96575  | 42.087  | 31.319   |
| 4     | 19.507    | 715053  | 17662  | 7.924   | 5.728    |
| Total |           | 9023755 | 308365 | 100.000 | 100.000  |

**3a iPrOH/Hex 1/9 OD-H**

<Chromatogram>

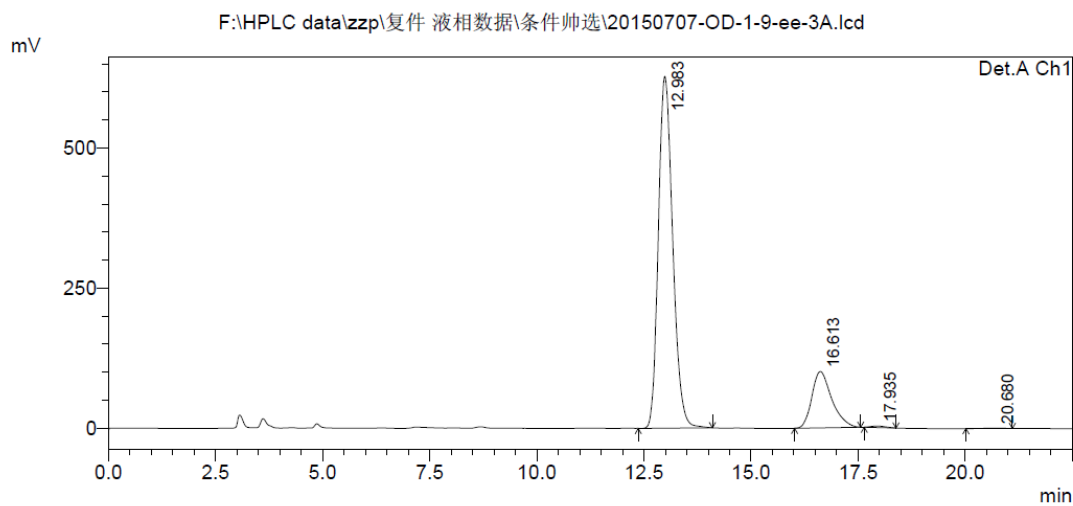

PeakTable

| Peak# | Ret. Time | Area     | Height | Area %  | Height % |
|-------|-----------|----------|--------|---------|----------|
| 1     | 12.983    | 14635542 | 627569 | 81.453  | 85.802   |
| 2     | 16.613    | 3254679  | 100709 | 18.114  | 13.769   |
| 3     | 17.935    | 65152    | 2712   | 0.363   | 0.371    |
| 4     | 20.680    | 12738    | 424    | 0.071   | 0.058    |
| Total |           | 17968111 | 731413 | 100.000 | 100.000  |

**Compound 3b:** 2-(1-(2,4-dimethoxyphenyl)-2-nitroethyl)-2-methylbenzofuran-3(2H)-one

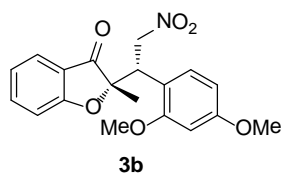

**Compound 3b:** yellow oil, 95% isolated yield.

**<sup>1</sup>H NMR** (400 MHz, CDCl<sub>3</sub>) δ 7.74 – 7.60 (m, 2H), 7.33 (d, *J* = 8.5 Hz, 1H), 7.11 (t, *J* = 7.5 Hz, 2H), 6.56 – 6.40 (m, 2H), 4.67 (s, 2H), 4.40 (s, 1H), 3.80 (d, *J* = 6.1 Hz, 6H), 1.27 (s, 3H).

**<sup>13</sup>C NMR** (100 MHz, CDCl<sub>3</sub>) δ 202.55 , 171.12 , 160.78 , 159.23 , 138.74 , 124.83 , 122.48 , 120.36 , 115.25 , 113.65 , 104.96 , 98.84 , 90.65 , 75.27 , 55.79 , 55.42 , 20.83 .

**HRMS (ESI)** calcd for C<sub>19</sub>H<sub>19</sub>NO<sub>6</sub> (M+Na)<sup>+</sup>: 380.1110, found: 380.1109.

**HPLC** The enantiomeric excess was determined by HPLC with an IC column at 210 nm (2-propanol: hexane=1:9), 1.0 mL/min; major isomer: *t*<sub>1</sub> = 23.96 min, *t*<sub>2</sub> = 25.52 min; minor isomer: *t*<sub>3</sub> = 19.65 min, *t*<sub>4</sub> = 20.57 min.

**[α]<sub>D</sub><sup>25</sup>** -291.0 (c = 0.7, CHCl<sub>3</sub>).



NMR copies of major product of compound **3b**:

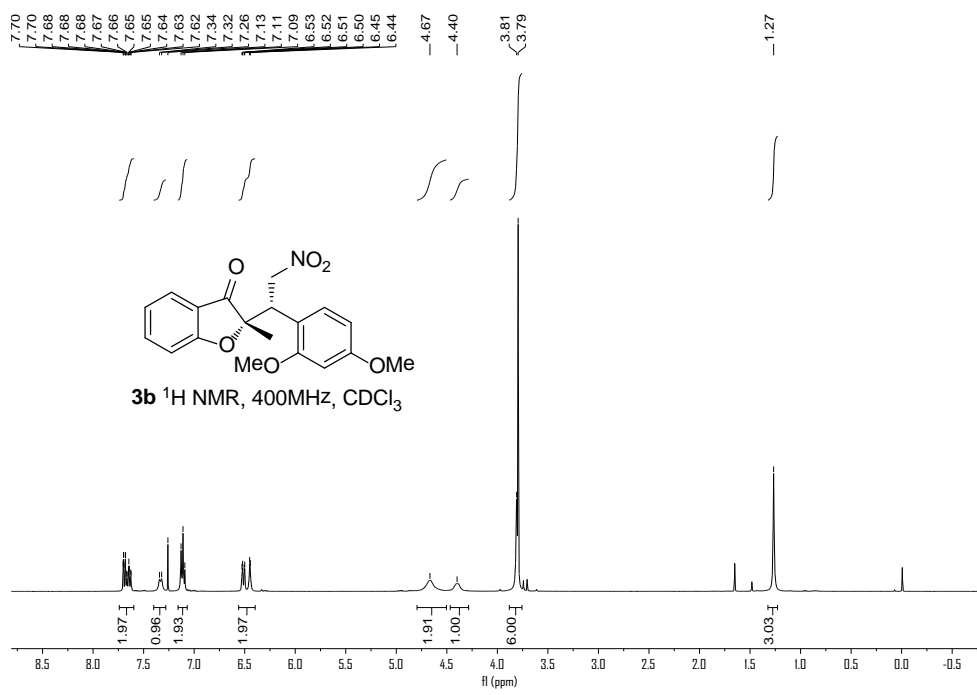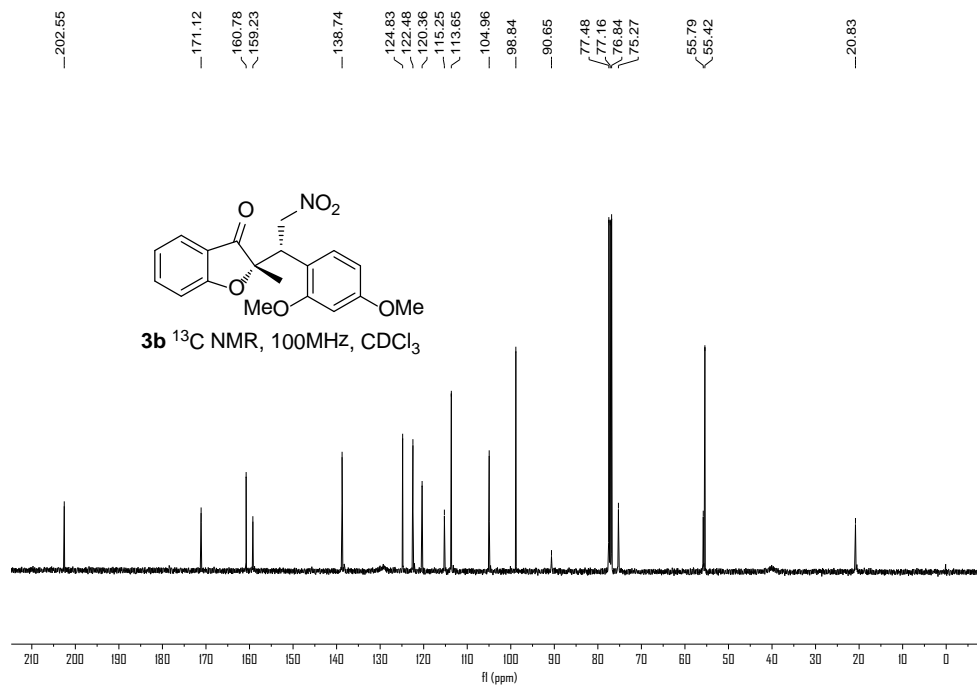

HPLC copies of compound **3b**:

**rac iPrOH/Hex 1/9 IC**

<Chromatogram>

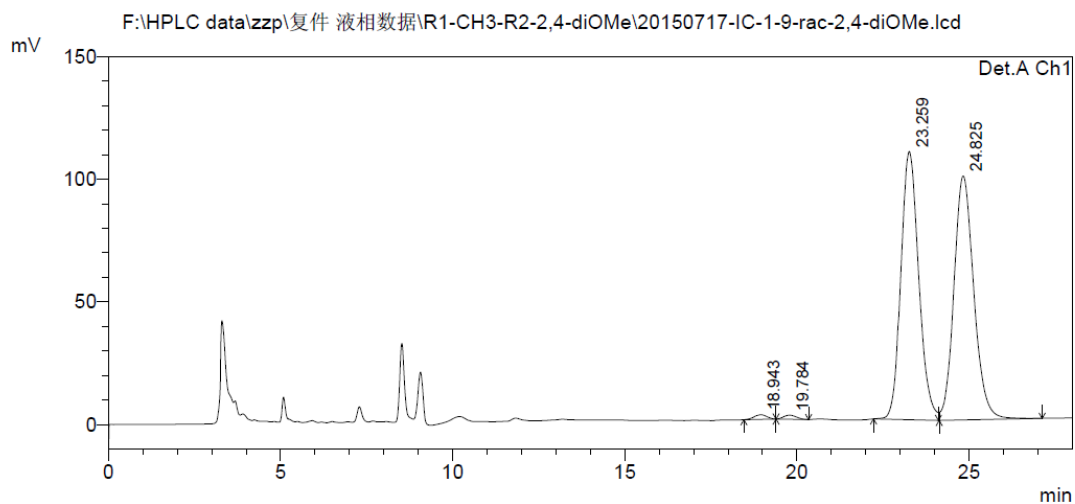

PeakTable

Detector A Ch1 210nm

| Peak# | Ret. Time | Area    | Height | Area %  | Height % |
|-------|-----------|---------|--------|---------|----------|
| 1     | 18.943    | 48503   | 1902   | 0.605   | 0.896    |
| 2     | 19.784    | 42629   | 1686   | 0.532   | 0.794    |
| 3     | 23.259    | 3940273 | 109289 | 49.138  | 51.474   |
| 4     | 24.825    | 3987331 | 99440  | 49.725  | 46.836   |
| Total |           | 8018736 | 212318 | 100.000 | 100.000  |

**3b iPrOH/Hex 1/9 IC**

<Chromatogram>

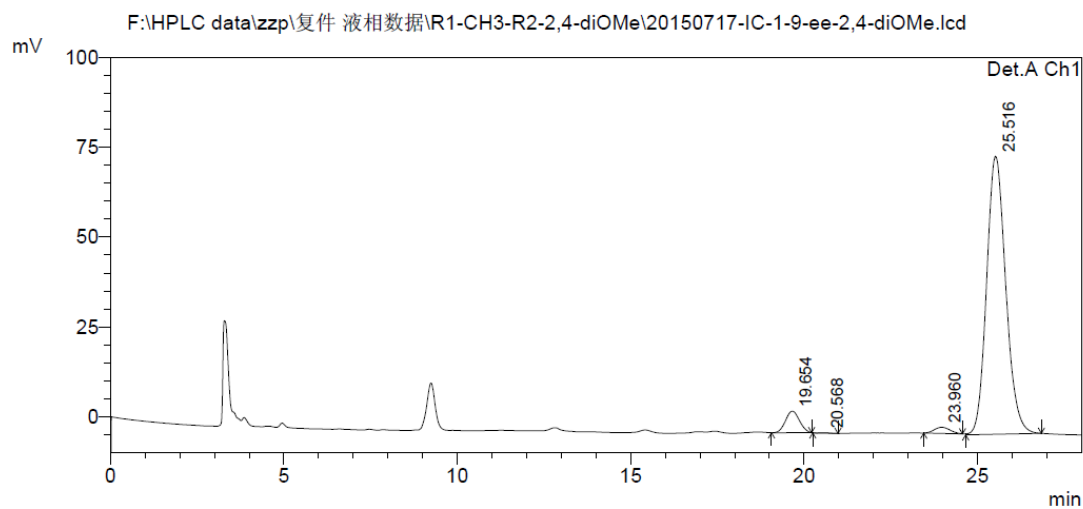

PeakTable

Detector A Ch1 210nm

| Peak# | Ret. Time | Area    | Height | Area %  | Height % |
|-------|-----------|---------|--------|---------|----------|
| 1     | 19.654    | 167527  | 5996   | 5.248   | 7.040    |
| 2     | 20.568    | 1601    | 109    | 0.050   | 0.128    |
| 3     | 23.960    | 52889   | 1695   | 1.657   | 1.990    |
| 4     | 25.516    | 2970457 | 77371  | 93.046  | 90.842   |
| Total |           | 3192474 | 85171  | 100.000 | 100.000  |

**Compound 3c:** 2-(1-([1,1'-biphenyl]-4-yl)-2-nitroethyl)-2-methylbenzofuran-3(2H)-one

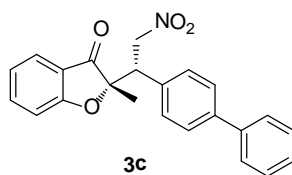

**Compound 3c:** white solid, 78% isolated yield.

**<sup>1</sup>H NMR** (400 MHz, CDCl<sub>3</sub>) δ 7.76 – 7.29 (m, 11H), 7.24 – 6.89 (m, 2H), 4.77 (dd, *J* = 13.1, 11.2 Hz, 1H), 4.41 (dd, *J* = 13.1, 4.1 Hz, 1H), 4.07 (dd, *J* = 11.2, 4.1 Hz, 1H), 1.56 (s, 1H), 1.31 (s, 2H).

**<sup>13</sup>C NMR** (100 MHz, CDCl<sub>3</sub>) δ 202.54, 171.36, 141.46, 140.47, 139.11, 138.57, 133.51, 129.85, 129.59, 128.95, 128.83, 127.67, 127.61, 127.20, 127.07, 125.01, 122.81, 120.16, 113.78, 90.24, 77.48, 77.16, 76.84, 75.69, 49.37, 21.66.

**HRMS (ESI)** calcd for C<sub>23</sub>H<sub>19</sub>NO<sub>4</sub> (M+Na)<sup>+</sup>: 396.1212, found: 396.1208.

**HPLC** The enantiomeric excess was determined by HPLC with an IC column at 210 nm (2-propanol: hexane=1:19), 1.0 mL/min; major isomer: *t*<sub>1</sub> = 23.64 min, *t*<sub>2</sub> = 34.19 min; minor isomer: *t*<sub>3</sub> = 29.29 min, *t*<sub>4</sub> = 31.99 min).

**[α]<sub>D</sub><sup>25</sup>** -112.4 (c = 0.9, CHCl<sub>3</sub>).

NMR copies of major product of compound **3c**:

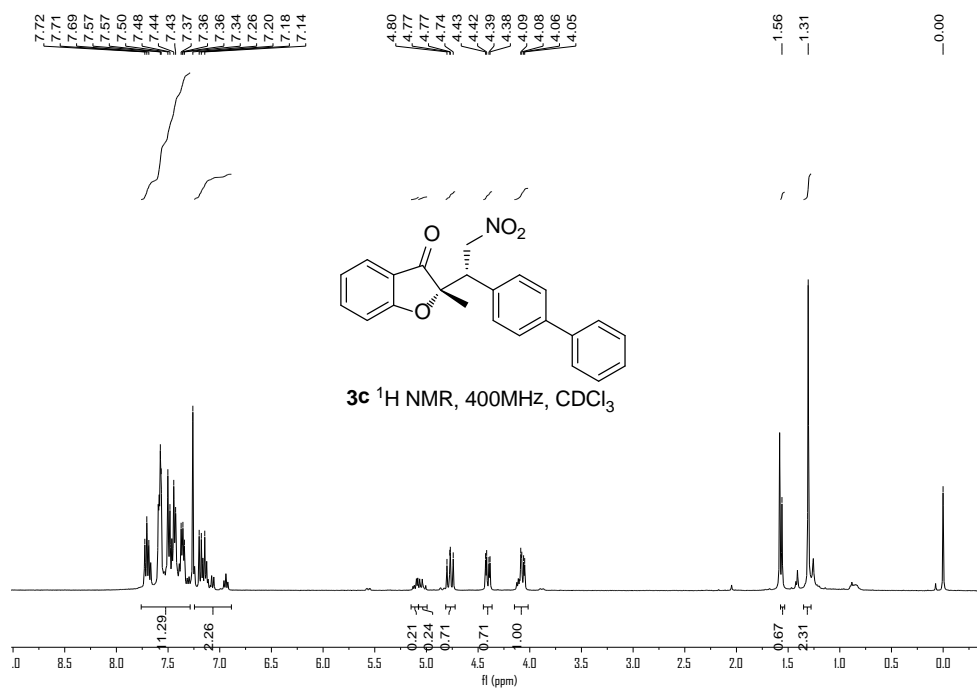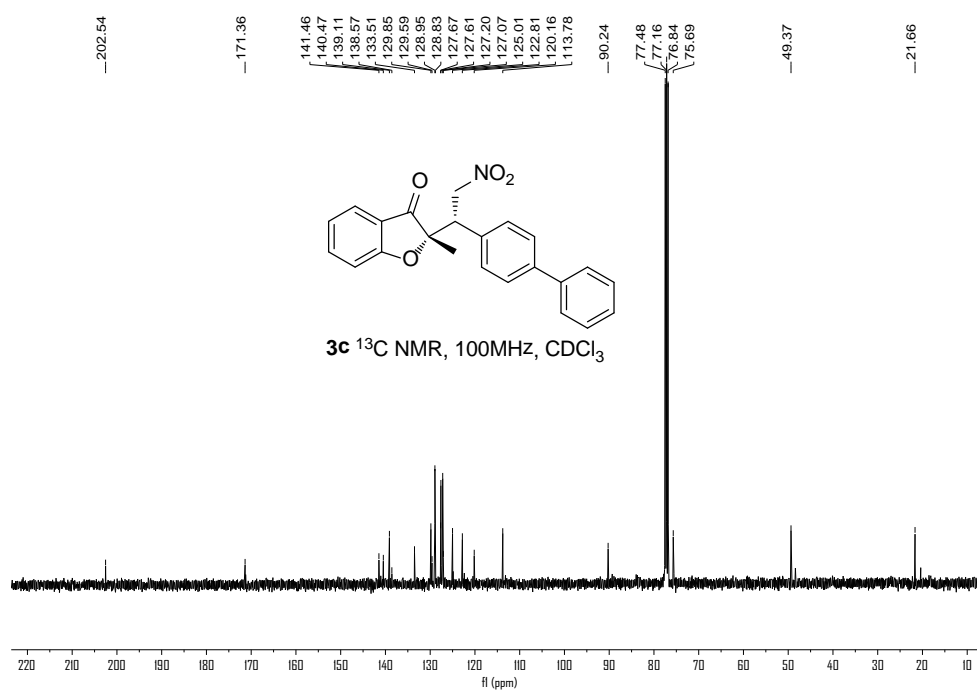

HPLC copies of compound **3c**:

**rac iPrOH/Hex 1/19 IC**

<Chromatogram>

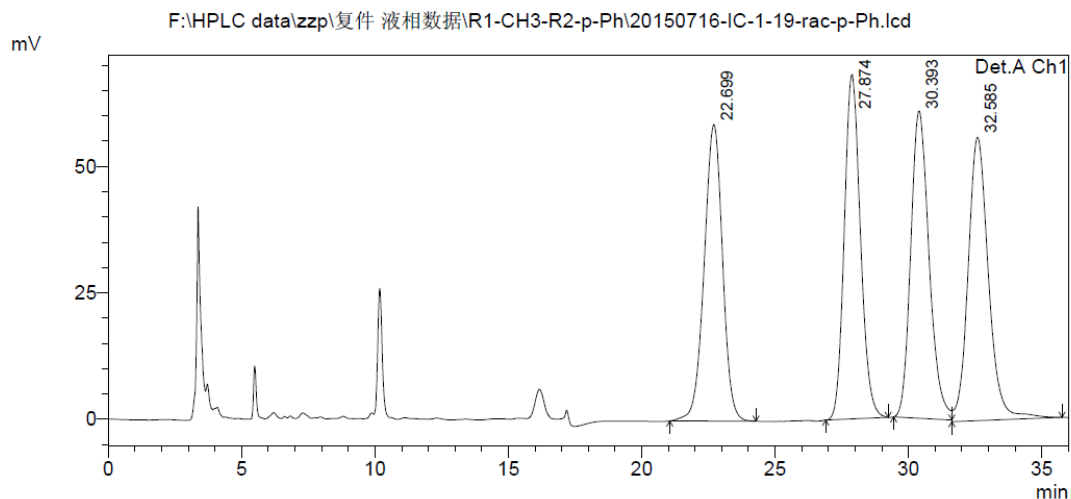

1 Det.A Ch1/210nm

PeakTable

| Peak# | Ret. Time | Area     | Height | Area %  | Height % |
|-------|-----------|----------|--------|---------|----------|
| 1     | 22.699    | 2811693  | 58624  | 24.322  | 24.078   |
| 2     | 27.874    | 2864479  | 68063  | 24.779  | 27.955   |
| 3     | 30.393    | 2905933  | 60752  | 25.137  | 24.952   |
| 4     | 32.585    | 2978057  | 56031  | 25.761  | 23.014   |
| Total |           | 11560162 | 243470 | 100.000 | 100.000  |

**3c iPrOH/Hex 1/19 IC**

<Chromatogram>

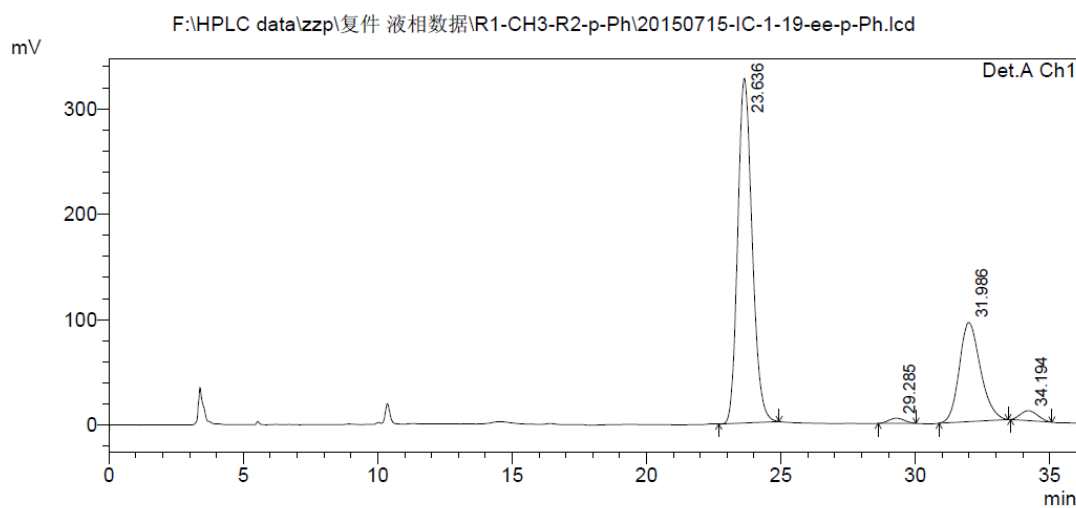

1 Det.A Ch1/210nm

PeakTable

| Peak# | Ret. Time | Area     | Height | Area %  | Height % |
|-------|-----------|----------|--------|---------|----------|
| 1     | 23.636    | 12211666 | 327056 | 67.922  | 75.103   |
| 2     | 29.285    | 197184   | 4884   | 1.097   | 1.122    |
| 3     | 31.986    | 5149781  | 94148  | 28.643  | 21.620   |
| 4     | 34.194    | 420364   | 9386   | 2.338   | 2.155    |
| Total |           | 17978994 | 435474 | 100.000 | 100.000  |

**Compound 3d:** 2-methyl-2-(2-nitro-1-phenylethyl)benzofuran-3(2H)-one

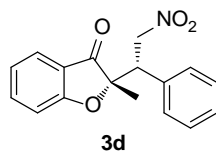

**Compound 3d:** light yellow oil, 99% isolated yield.

**<sup>1</sup>H NMR** (400 MHz, CDCl<sub>3</sub>) δ 7.75 – 7.64 (m, 2H), 7.44 – 7.28 (m, 5H), 7.19 – 7.10 (m, 2H), 4.74 (dd, *J* = 13.1, 11.1 Hz, 1H), 4.38 (dd, *J* = 13.0, 4.2 Hz, 1H), 4.01 (dd, *J* = 11.1, 4.2 Hz, 1H), 1.26 (s, 3H).

**<sup>13</sup>C NMR** (100 MHz, CDCl<sub>3</sub>) δ 202.57, 171.35, 139.08, 134.53, 129.43, 129.19, 128.93, 128.65, 128.51, 124.98, 122.77, 120.15, 113.75, 90.21, 75.72, 49.68, 21.59.

**HRMS (ESI)** calcd for C<sub>17</sub>H<sub>15</sub>NO<sub>4</sub> (M+Na)<sup>+</sup>: 320.0899, found: 320.0898.

**HPLC** The enantiomeric excess was determined by HPLC with an IC column at 210 nm (2-propanol: hexane=1:9), 1.0 mL/min; major isomer: *t*<sub>1</sub> = 12.40 min, *t*<sub>2</sub> = 17.99 min; minor isomer: *t*<sub>3</sub> = 13.80 min, *t*<sub>4</sub> = 14.97 min).

**[α]<sub>D</sub><sup>25</sup>** -267.7 (c = 0.9, CHCl<sub>3</sub>).

NMR copies of major product of compound **3d**:

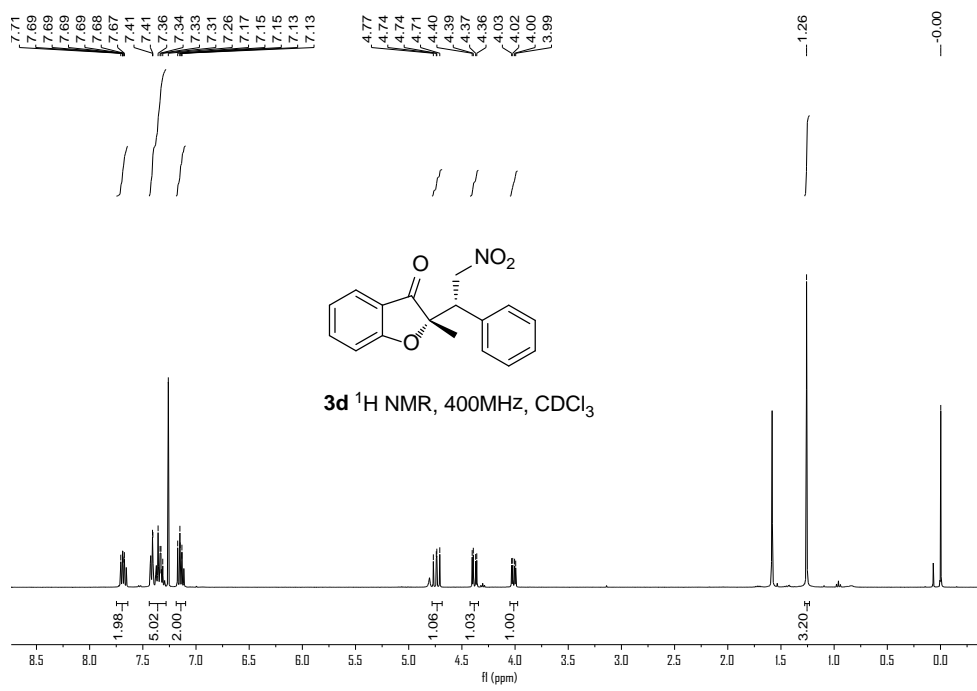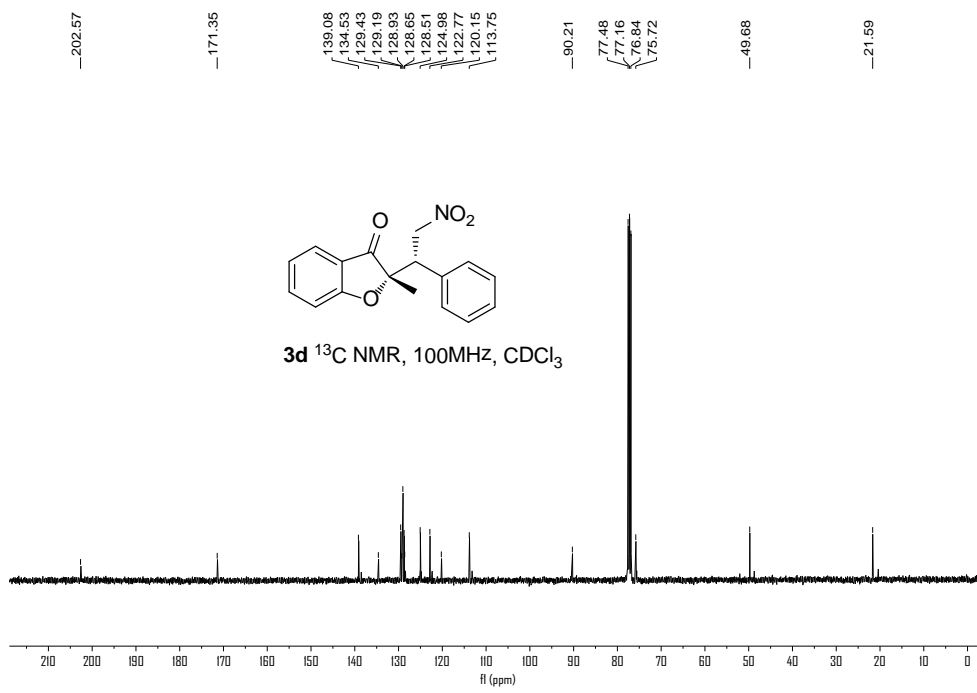

HPLC copies of compound **3d**:

**rac iPrOH/Hex 1/9 IC**

<Chromatogram>

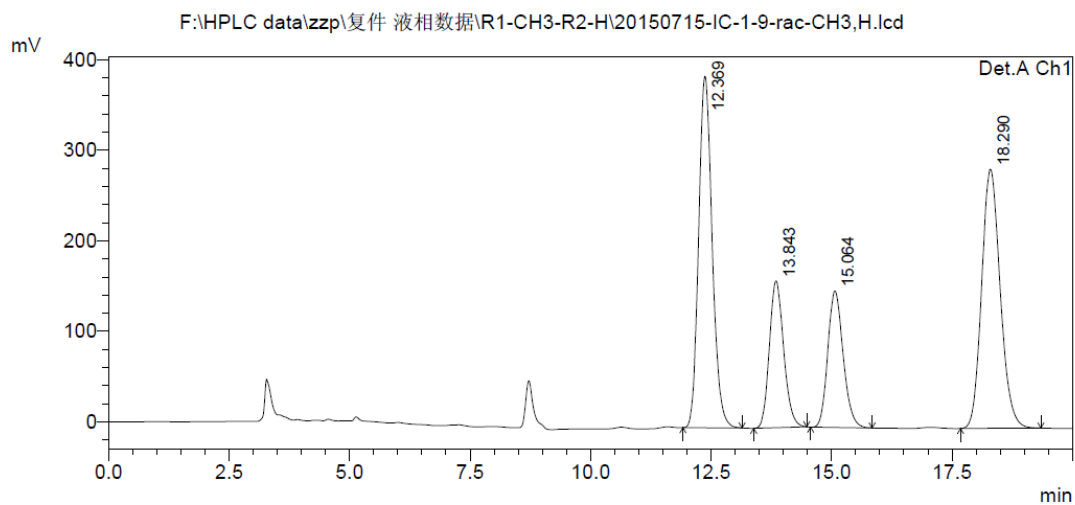

PeakTable

| Peak# | Ret. Time | Area     | Height | Area %  | Height % |
|-------|-----------|----------|--------|---------|----------|
| 1     | 12.369    | 7593428  | 388380 | 34.562  | 39.331   |
| 2     | 13.843    | 3348692  | 162132 | 15.242  | 16.419   |
| 3     | 15.064    | 3354320  | 150865 | 15.267  | 15.278   |
| 4     | 18.290    | 7674143  | 286101 | 34.929  | 28.973   |
| Total |           | 21970583 | 987477 | 100.000 | 100.000  |

**3d iPrOH/Hex 1/9 IC**

<Chromatogram>

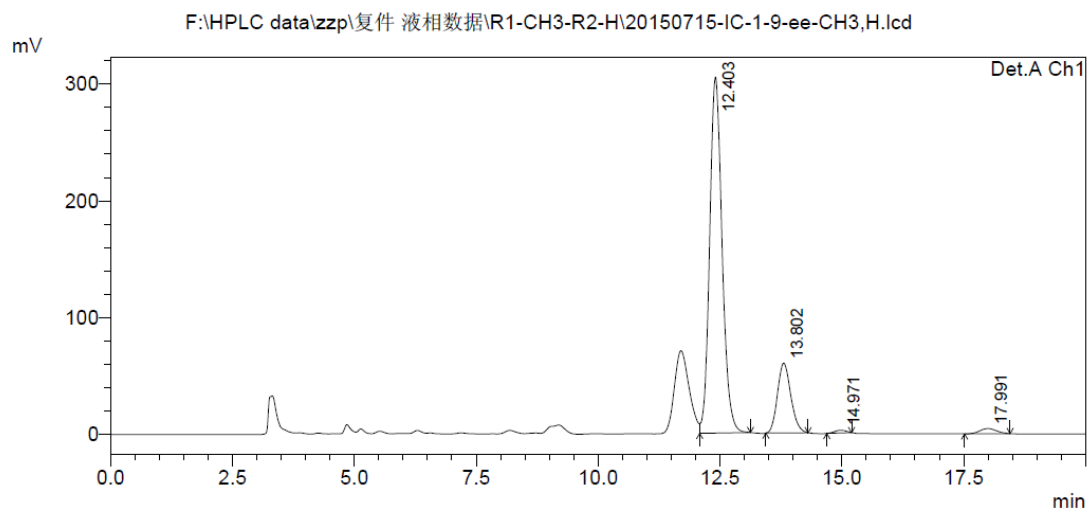

PeakTable

| Peak# | Ret. Time | Area    | Height | Area %  | Height % |
|-------|-----------|---------|--------|---------|----------|
| 1     | 12.403    | 5394153 | 304841 | 80.816  | 82.081   |
| 2     | 13.802    | 1137757 | 59771  | 17.046  | 16.094   |
| 3     | 14.971    | 37757   | 2328   | 0.566   | 0.627    |
| 4     | 17.991    | 104914  | 4451   | 1.572   | 1.199    |
| Total |           | 6674581 | 371391 | 100.000 | 100.000  |



**Compound 3e:** 2-(1-(2-bromophenyl)-2-nitroethyl)-2-methylbenzofuran-3(2H)-one

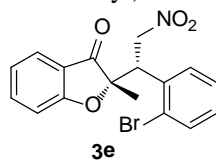

**Compound 3e:** yellow oil, 96% isolated yield.

**<sup>1</sup>H NMR** (400 MHz, CDCl<sub>3</sub>) δ7.74 – 7.57 (m, 4H), 7.36 (td, *J* = 7.6, 1.3 Hz, 1H), 7.22 – 7.12 (m, 3H), 4.88 (dd, *J* = 11.1, 4.2 Hz, 1H), 4.72 (dd, *J* = 13.2, 11.1 Hz, 1H), 4.41 (dd, *J* = 13.2, 4.2 Hz, 1H), 1.30 (s, 3H).

**<sup>13</sup>C NMR** (100 MHz, CDCl<sub>3</sub>) δ201.84 , 171.11 , 139.10 , 134.42 , 133.68 , 129.94 , 128.90 , 128.07 , 127.23 , 125.08 , 122.87 , 120.07 , 113.69 , 90.16 , 75.17 , 46.98 , 20.92 .

**HRMS (ESI)** calcd for C<sub>17</sub>H<sub>14</sub>BrNO<sub>4</sub> (M+Na)<sup>+</sup>: 398.0004, found: 398.0004.

**HPLC** The enantiomeric excess was determined by HPLC with an AD-H column at 210 nm (2-propanol: hexane=1:9), 1.0 mL/min; major isomer: *t*<sub>1</sub> = 10.21 min, *t*<sub>2</sub> = 12.27 min; minor isomer: *t*<sub>3</sub> = 9.79 min, *t*<sub>4</sub> = 11.48 min).

**[α]<sub>D</sub><sup>25</sup>** -232.9 (c = 0.9, CHCl<sub>3</sub>)

NMR copies of major product of compound **3e**:

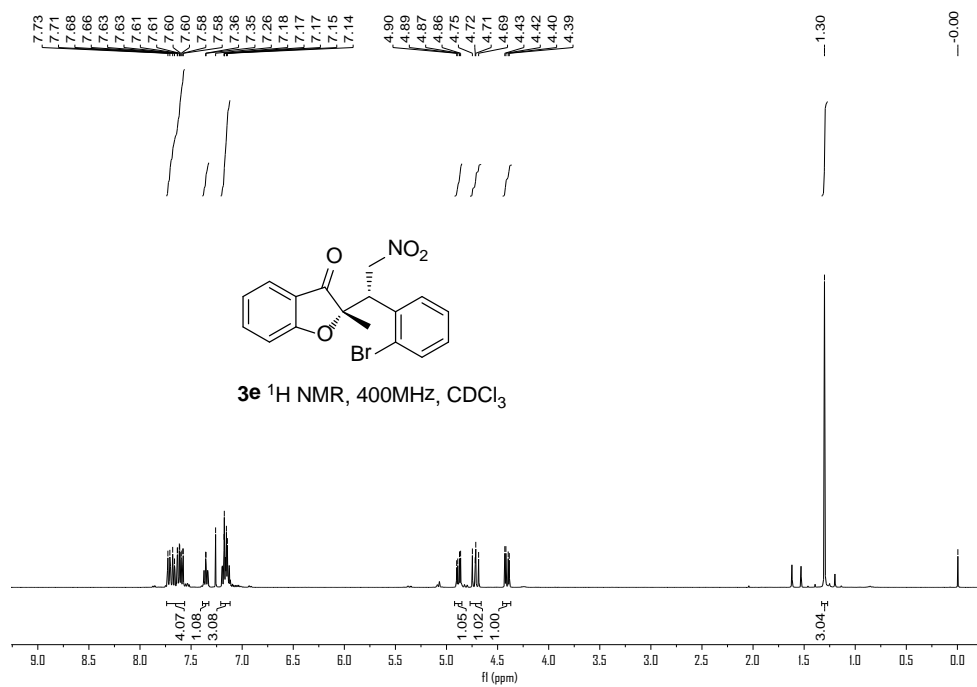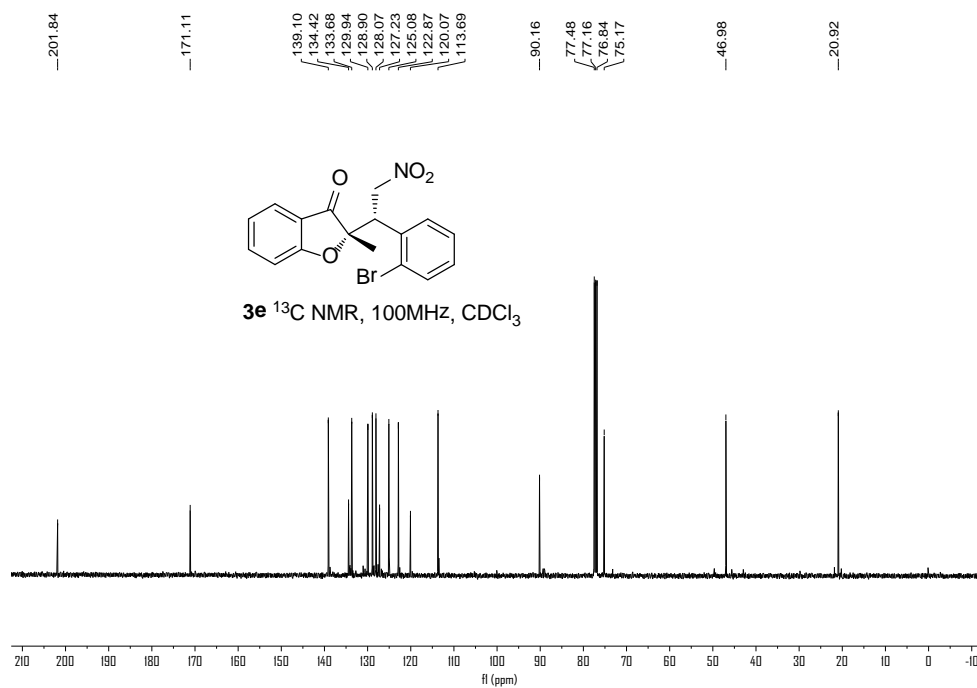

HPLC copies of compound **3e**:

**rac iPrOH/Hex 1/9 AD-H**

<Chromatogram>

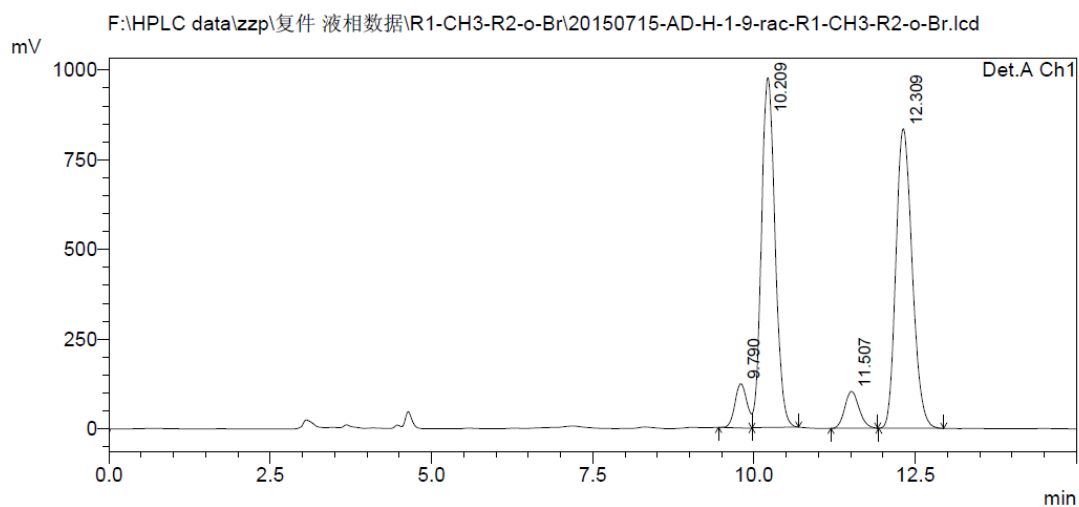

PeakTable

| Peak# | Ret. Time | Area     | Height  | Area %  | Height % |
|-------|-----------|----------|---------|---------|----------|
| 1     | 9.790     | 1616225  | 123388  | 5.008   | 6.060    |
| 2     | 10.209    | 14393241 | 975015  | 44.599  | 47.885   |
| 3     | 11.507    | 1589855  | 102939  | 4.926   | 5.056    |
| 4     | 12.309    | 14673108 | 834804  | 45.466  | 40.999   |
| Total |           | 32272429 | 2036146 | 100.000 | 100.000  |

**3e iPrOH/Hex 1/9 AD-H**

<Chromatogram>

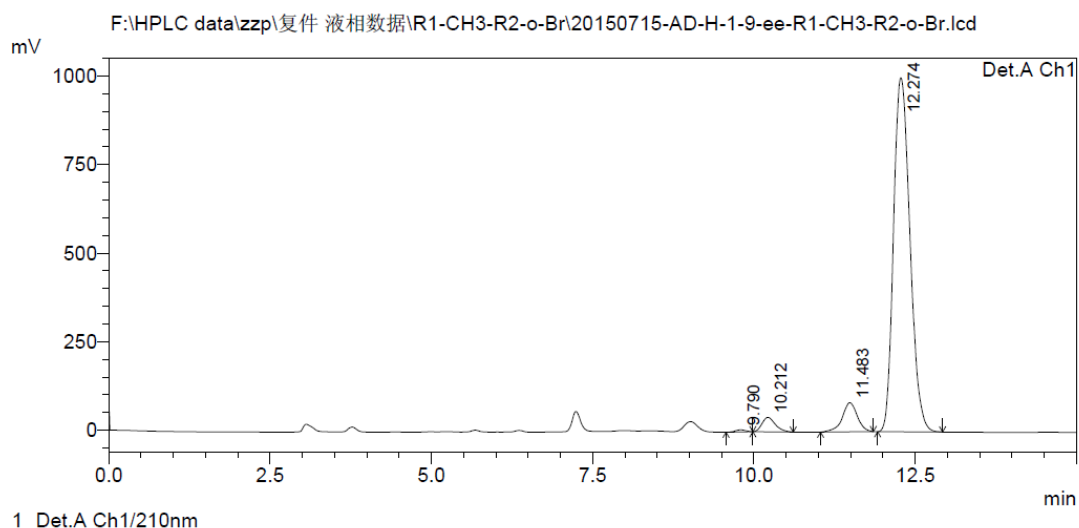

PeakTable

| Peak# | Ret. Time | Area     | Height  | Area %  | Height % |
|-------|-----------|----------|---------|---------|----------|
| 1     | 9.790     | 64017    | 5850    | 0.325   | 0.518    |
| 2     | 10.212    | 582917   | 40720   | 2.958   | 3.607    |
| 3     | 11.483    | 1330964  | 82240   | 6.754   | 7.285    |
| 4     | 12.274    | 17727565 | 1000052 | 89.963  | 88.589   |
| Total |           | 19705463 | 1128863 | 100.000 | 100.000  |

**Compound 3f:** 2-(1-(3-bromophenyl)-2-nitroethyl)-2-methylbenzofuran-3(2H)-one

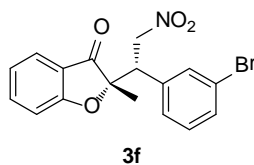

**Compound 3f:** yellow oil, 77% isolated yield.

**<sup>1</sup>H NMR** (400 MHz, CDCl<sub>3</sub>) δ 7.73 – 6.95 (m, 8H), 4.69 (dd, *J* = 13.3, 11.2 Hz, 1H), 4.36 (dd, *J* = 13.3, 4.1 Hz, 1H), 3.98 (dd, *J* = 11.3, 4.1 Hz, 1H), 1.27 (s, 3H).

**<sup>13</sup>C NMR** (100 MHz, CDCl<sub>3</sub>) δ 202.07, 171.24, 139.21, 136.96, 132.33, 131.87, 131.54, 130.46, 128.16, 125.00, 122.93, 120.00, 113.79, 89.77, 75.41, 49.25, 21.57.

**HRMS (ESI)** calcd for C<sub>17</sub>H<sub>14</sub>BrNO<sub>4</sub> (M+Na)<sup>+</sup>: 398.0004, found: 398.0001.

**HPLC** The enantiomeric excess was determined by HPLC with an AD-H column at 210 nm (2-propanol: hexane=1:9), 1.0 mL/min; major isomer: *t*<sub>1</sub> = 8.78 min, *t*<sub>2</sub> = 14.94 min; minor isomer: *t*<sub>3</sub> = 9.79 min, *t*<sub>4</sub> = 11.86 min).

**[α]<sub>D</sub><sup>25</sup>** -245.8 (c = 0.9, CHCl<sub>3</sub>)

NMR copies of major product of compound **3f**:

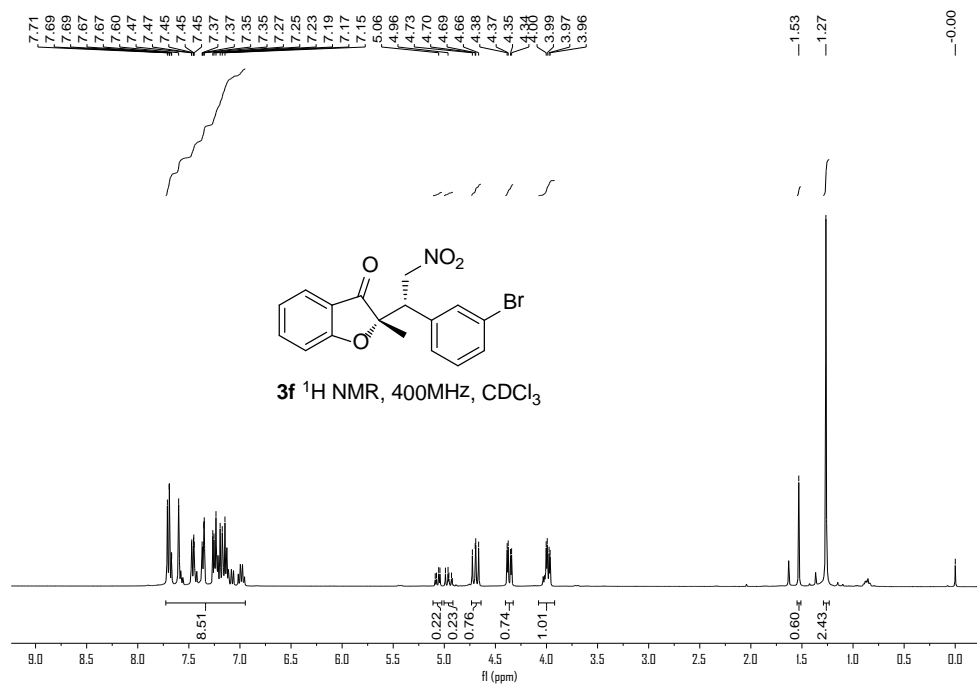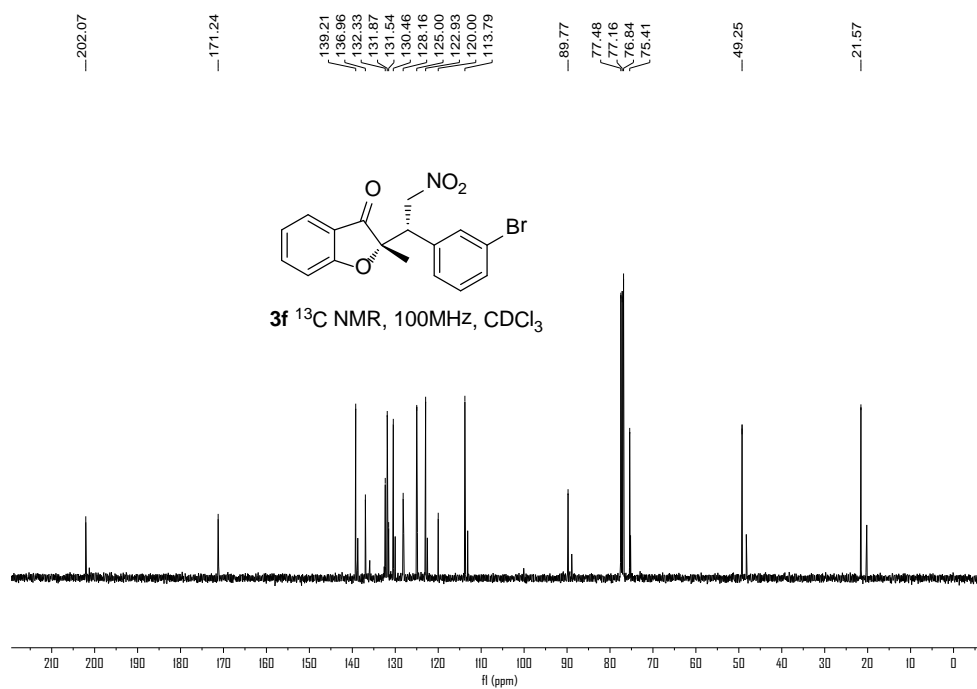

HPLC copies of compound **3f**:

**rac iPrOH/Hex 1/9 AD-H**

<Chromatogram>

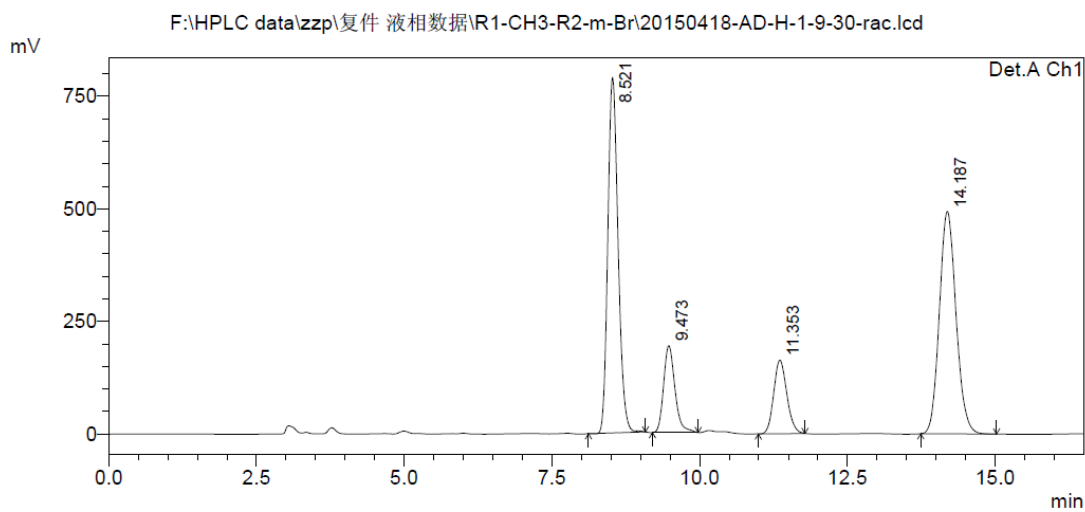

PeakTable

| Peak# | Ret. Time | Area     | Height  | Area %  | Height % |
|-------|-----------|----------|---------|---------|----------|
| 1     | 8.521     | 9549026  | 789273  | 39.225  | 48.139   |
| 2     | 9.473     | 2574945  | 192974  | 10.577  | 11.770   |
| 3     | 11.353    | 2528009  | 163426  | 10.384  | 9.968    |
| 4     | 14.187    | 9692554  | 493881  | 39.814  | 30.123   |
| Total |           | 24344534 | 1639554 | 100.000 | 100.000  |

**3f iPrOH/Hex 1/9 AD-H**

<Chromatogram>

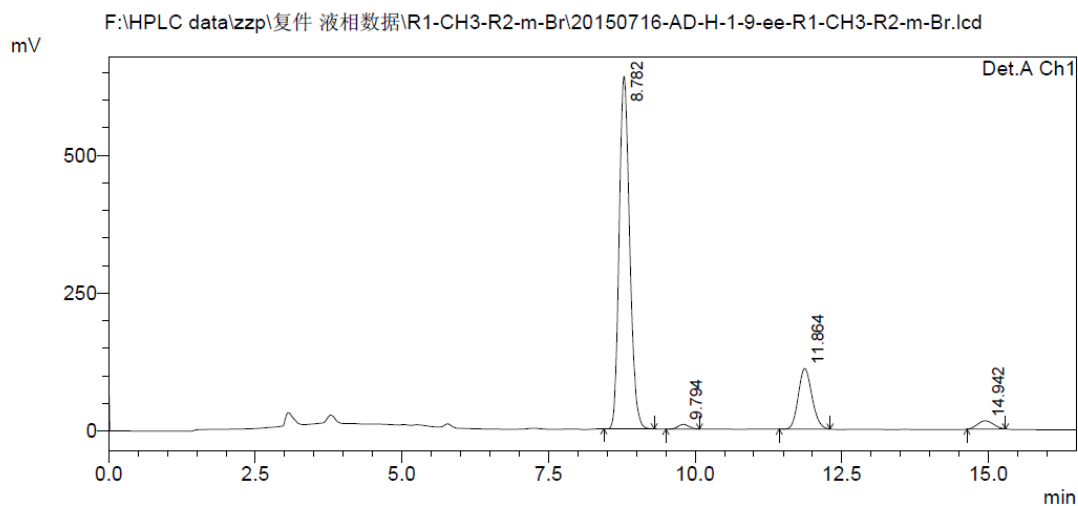

PeakTable

| Peak# | Ret. Time | Area     | Height | Area %  | Height % |
|-------|-----------|----------|--------|---------|----------|
| 1     | 8.782     | 7984558  | 639206 | 78.574  | 82.722   |
| 2     | 9.794     | 111220   | 8524   | 1.094   | 1.103    |
| 3     | 11.864    | 1781296  | 109925 | 17.529  | 14.226   |
| 4     | 14.942    | 284731   | 15061  | 2.802   | 1.949    |
| Total |           | 10161805 | 772715 | 100.000 | 100.000  |

**Compound 3g:** 2-(1-(4-bromophenyl)-2-nitroethyl)-2-methylbenzofuran-3(2H)-one

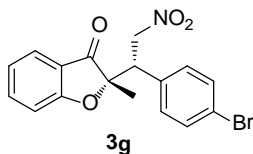

**Compound 3g:** yellow oil, 96% isolated yield.

**<sup>1</sup>H NMR** (400 MHz, CDCl<sub>3</sub>) δ 7.71 – 7.28 (m, 5H), 7.26 – 6.94 (m, 3H), 4.69 (dd, *J* = 13.1, 11.3 Hz, 1H), 4.38 (dd, *J* = 13.1, 4.1 Hz, 1H), 3.98 (dd, *J* = 11.1, 4.0 Hz, 1H), 1.52 (s, 1H), 1.26 (s, 2H).

**<sup>13</sup>C NMR** (100 MHz, CDCl<sub>3</sub>) δ 202.16, 171.23, 139.21, 133.60, 132.13, 131.72, 131.08, 130.81, 125.00, 122.92, 122.57, 120.00, 113.74, 89.74, 75.44, 49.14, 21.55.

**HRMS (ESI)** calcd for C<sub>17</sub>H<sub>14</sub>BrNO<sub>4</sub> (M+Na)<sup>+</sup>: 398.0004, found: 398.0002.

**HPLC** The enantiomeric excess was determined by HPLC with an IC column at 210 nm (2-propanol: hexane=1:9), 1.0 mL/min; major isomer: *t*<sub>1</sub> = 11.81 min, *t*<sub>2</sub> = 16.91 min; minor isomer: *t*<sub>3</sub> = 13.11 min, *t*<sub>4</sub> = 13.68 min).

**[α]<sub>D</sub><sup>25</sup>** -124.4 (c = 0.9, CHCl<sub>3</sub>)

NMR copies of major product of compound **3g**:

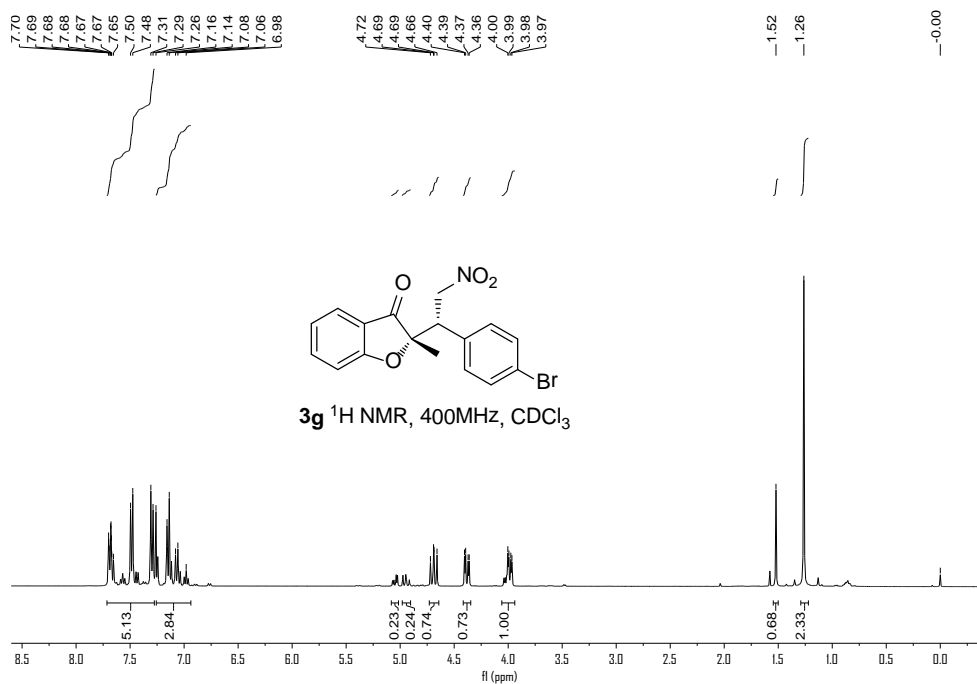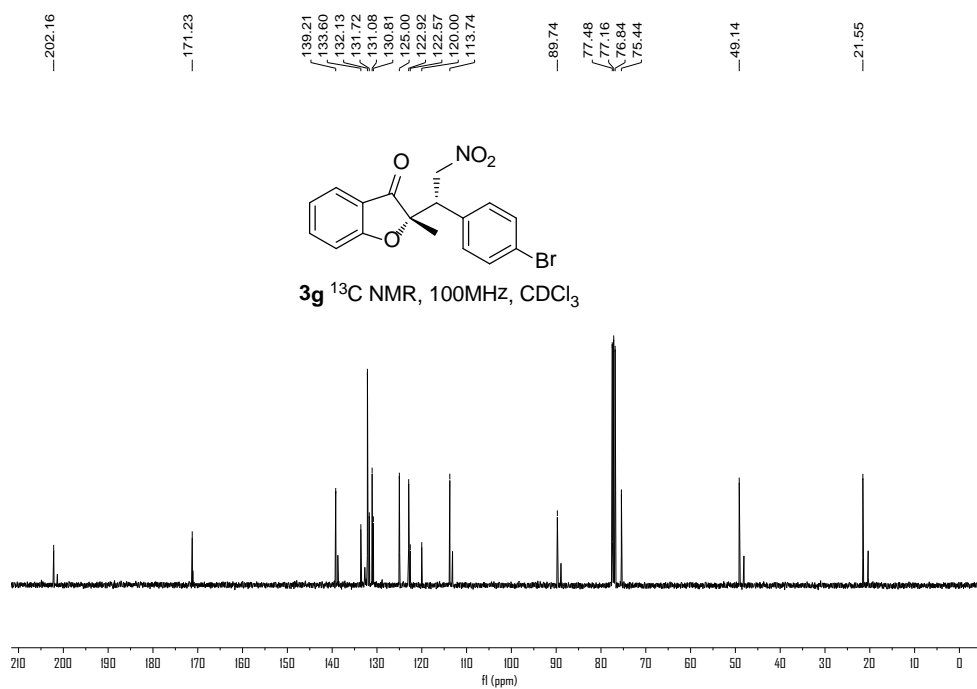



HPLC copies of compound **3g**:

**rac iPrOH/Hex 1/9 IC**

<Chromatogram>

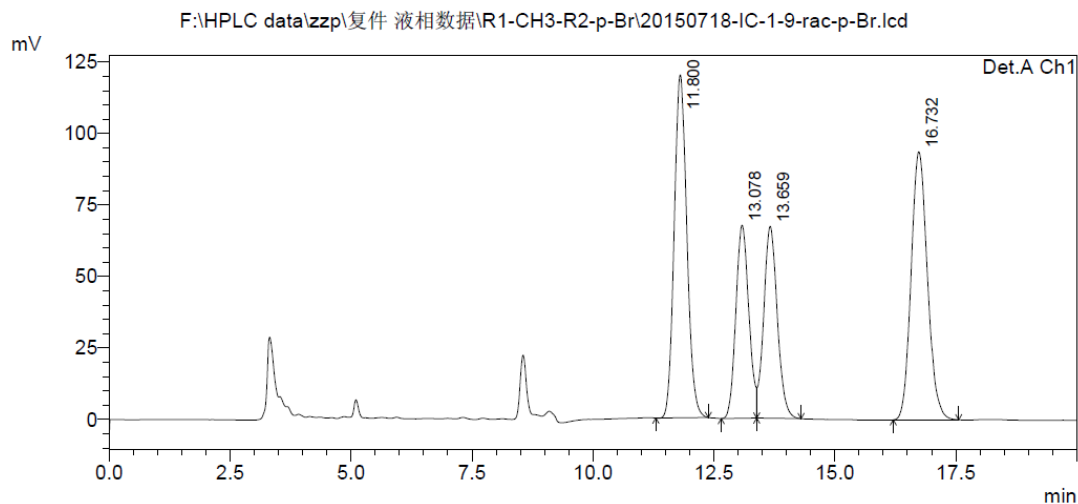

1 Det.A Ch1/210nm

PeakTable

| Peak# | Ret. Time | Area    | Height | Area %  | Height % |
|-------|-----------|---------|--------|---------|----------|
| 1     | 11.800    | 2184093 | 119868 | 31.399  | 34.432   |
| 2     | 13.078    | 1260788 | 67458  | 18.125  | 19.377   |
| 3     | 13.659    | 1313739 | 67082  | 18.886  | 19.269   |
| 4     | 16.732    | 2197380 | 93721  | 31.590  | 26.921   |
| Total |           | 6955999 | 348129 | 100.000 | 100.000  |

**3g iPrOH/Hex 1/9 IC**

<Chromatogram>

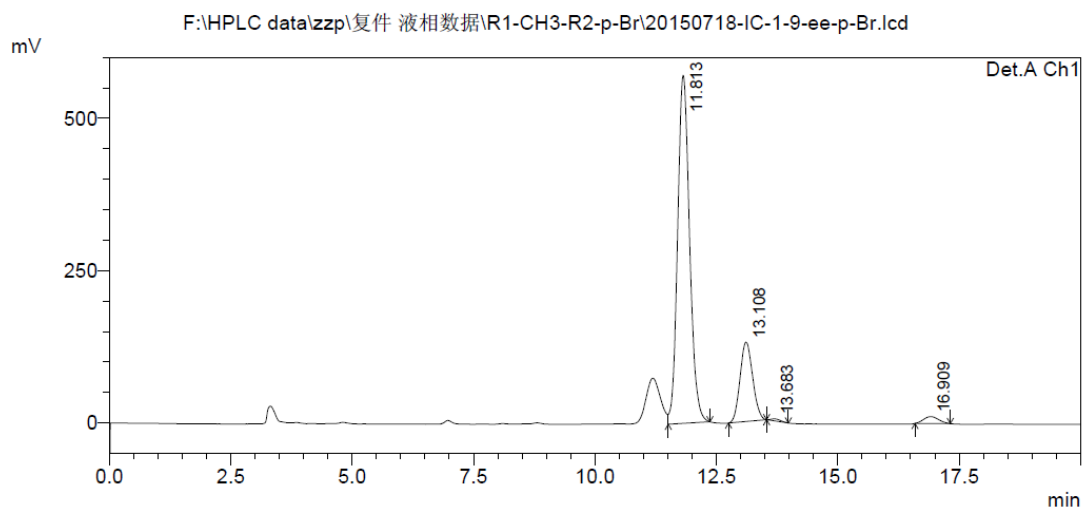

1 Det.A Ch1/210nm

PeakTable

| Peak# | Ret. Time | Area     | Height | Area %  | Height % |
|-------|-----------|----------|--------|---------|----------|
| 1     | 11.813    | 9769493  | 571502 | 78.695  | 79.731   |
| 2     | 13.108    | 2355271  | 130596 | 18.972  | 18.220   |
| 3     | 13.683    | 46652    | 3371   | 0.376   | 0.470    |
| 4     | 16.909    | 242919   | 11320  | 1.957   | 1.579    |
| Total |           | 12414335 | 716789 | 100.000 | 100.000  |

**Compound 3h:** 2-(1-(2-chlorophenyl)-2-nitroethyl)-2-methylbenzofuran-3(2H)-one

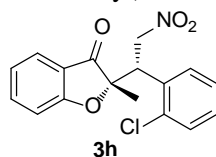

**Compound 3h:** yellow oil, 87% isolated yield.

**<sup>1</sup>H NMR** (400 MHz, CDCl<sub>3</sub>) δ 7.69 (dd, *J* = 17.9, 7.4 Hz, 2H), 7.59 (dd, *J* = 7.7, 1.8 Hz, 1H), 7.44 (dd, *J* = 7.8, 1.6 Hz, 1H), 7.29 (dd, *J* = 14.7, 1.7 Hz, 2H), 7.18 – 7.12 (m, 2H), 4.89 (dd, *J* = 11.2, 4.2 Hz, 1H), 4.72 (dd, *J* = 13.3, 11.2 Hz, 1H), 4.42 (dd, *J* = 13.3, 4.2 Hz, 1H), 1.29 (s, 3H).

**<sup>13</sup>C NMR** (100 MHz, CDCl<sub>3</sub>) δ 201.88, 171.14, 139.11, 136.24, 132.68, 130.27, 129.68, 128.82, 127.43, 125.08, 122.87, 120.10, 113.70, 90.13, 75.03, 44.18, 20.86.

**HRMS (ESI)** calcd for C<sub>17</sub>H<sub>14</sub>ClNO<sub>4</sub> (M+Na)<sup>+</sup>: 354.0509, found: 354.0507.

**HPLC** The enantiomeric excess was determined by HPLC with an IC column at 210 nm (2-propanol: hexane=1:9), 1.0 mL/min; major isomer: *t*<sub>1</sub> = 15.22 min, *t*<sub>2</sub> = 16.05 min; minor isomer: *t*<sub>3</sub> = 13.55 min, *t*<sub>4</sub> = 21.25 min).

[α]<sub>D</sub><sup>25</sup> -276.7 (c = 0.8, CHCl<sub>3</sub>)

NMR copies of major product of compound **3h**:

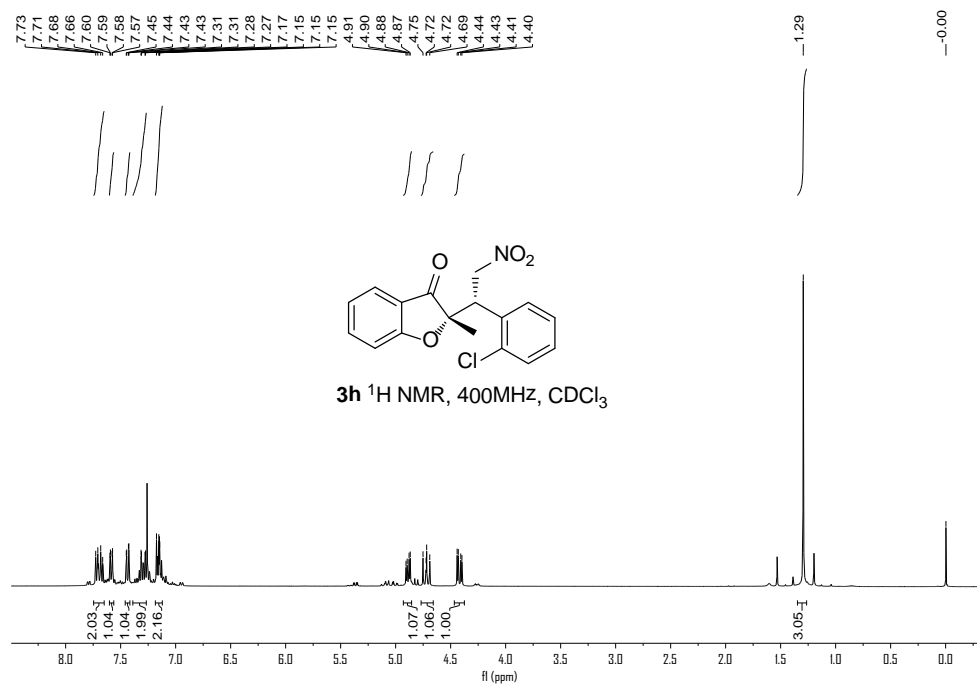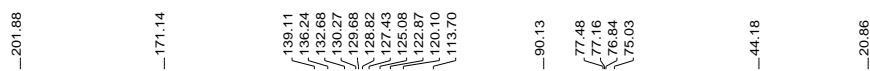

HPLC copies of compound **3h**:

**rac iPrOH/Hex 1/9 IC**

<Chromatogram>

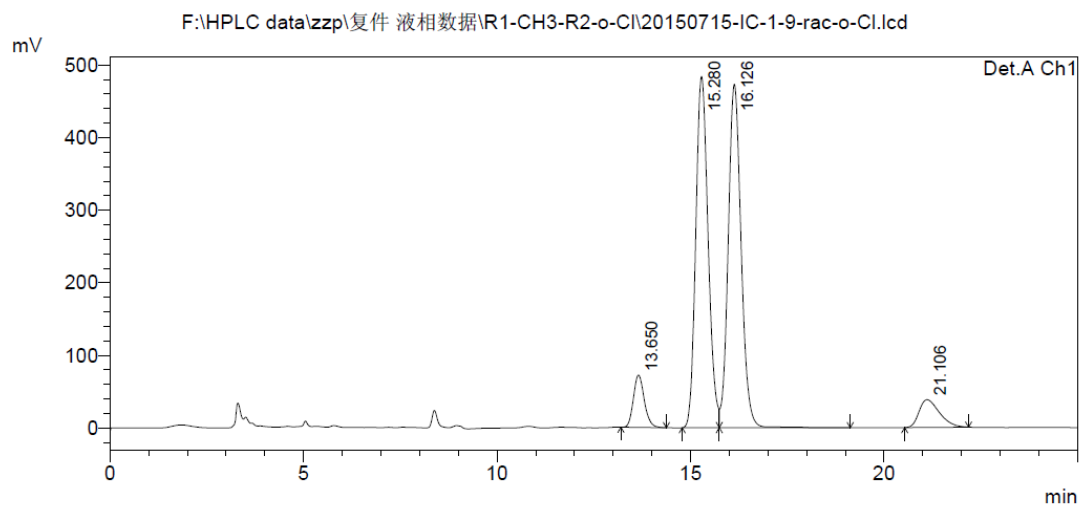

1 Det.A Ch1/210nm

PeakTable

| Peak# | Ret. Time | Area     | Height  | Area %  | Height % |
|-------|-----------|----------|---------|---------|----------|
| 1     | 13.650    | 1408116  | 72101   | 5.752   | 6.756    |
| 2     | 15.280    | 10718552 | 483882  | 43.781  | 45.342   |
| 3     | 16.126    | 10960818 | 472989  | 44.770  | 44.322   |
| 4     | 21.106    | 1394845  | 38203   | 5.697   | 3.580    |
| Total |           | 24482331 | 1067174 | 100.000 | 100.000  |

**3h iPrOH/Hex 1/9 IC**

<Chromatogram>

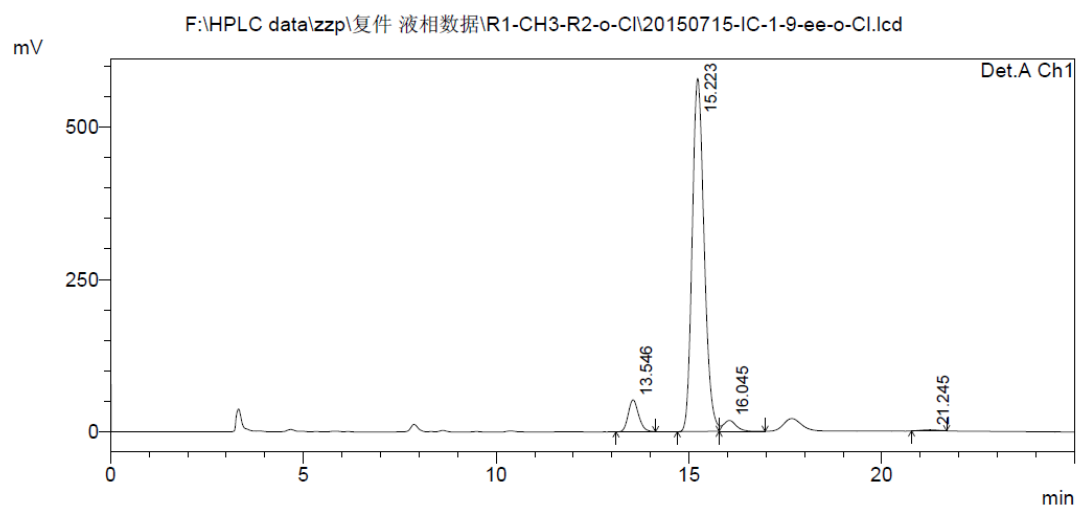

1 Det.A Ch1/210nm

PeakTable

| Peak# | Ret. Time | Area     | Height | Area %  | Height % |
|-------|-----------|----------|--------|---------|----------|
| 1     | 13.546    | 983983   | 52365  | 7.060   | 8.037    |
| 2     | 15.223    | 12482804 | 579655 | 89.561  | 88.968   |
| 3     | 16.045    | 422489   | 17823  | 3.031   | 2.736    |
| 4     | 21.245    | 48516    | 1687   | 0.348   | 0.259    |
| Total |           | 13937791 | 651531 | 100.000 | 100.000  |

**Compound 3i:** 2-(1-(3-chlorophenyl)-2-nitroethyl)-2-methylbenzofuran-3(2H)-one

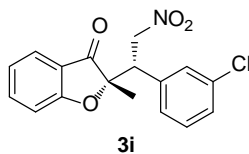

**Compound 3i:** Colorless oil, 84% isolated yield.

**<sup>1</sup>H NMR** (400 MHz, CDCl<sub>3</sub>) δ 7.76 – 7.28 (m, 5H), 7.22 – 6.94 (m, 3H), 4.69 (dd, *J* = 13.2, 11.2 Hz, 1H), 4.36 (dd, *J* = 13.3, 4.1 Hz, 1H), 3.99 (dd, *J* = 11.2, 4.1 Hz, 1H), 1.27 (s, 3H).

**<sup>13</sup>C NMR** (100 MHz, CDCl<sub>3</sub>) δ 202.12, 171.29, 139.23, 136.70, 130.21, 129.77, 129.47, 128.98, 127.77, 125.04, 122.95, 120.04, 113.80, 89.81, 75.46, 49.33, 21.59.

**HRMS (ESI)** calcd for C<sub>17</sub>H<sub>14</sub>ClNO<sub>4</sub> (M+Na)<sup>+</sup>: 354.0509, found: 354.0508.

**HPLC** The enantiomeric excess was determined by HPLC with an IC column at 210 nm (2-propanol: hexane=2:98), 1.0 mL/min; major isomer: *t*<sub>1</sub> = 22.85 min, *t*<sub>2</sub> = 32.95 min; minor isomer: *t*<sub>3</sub> = 29.24 min, *t*<sub>4</sub> = 31.03 min)..

**[α]<sub>D</sub><sup>25</sup>** -293.3 (c = 0.6, CHCl<sub>3</sub>)

NMR copies of major product of compound **3i**:

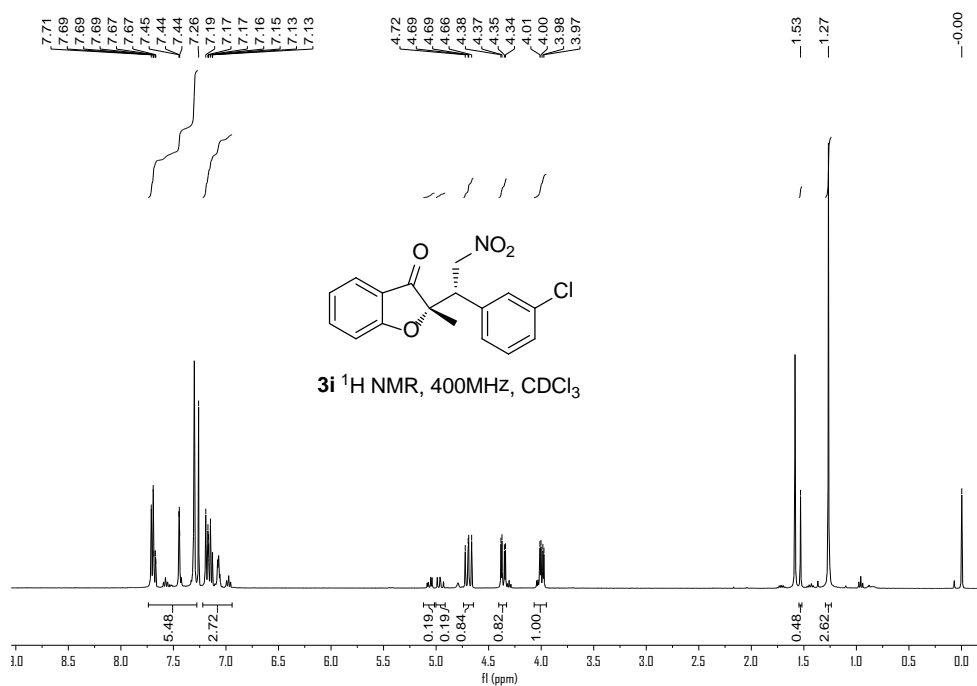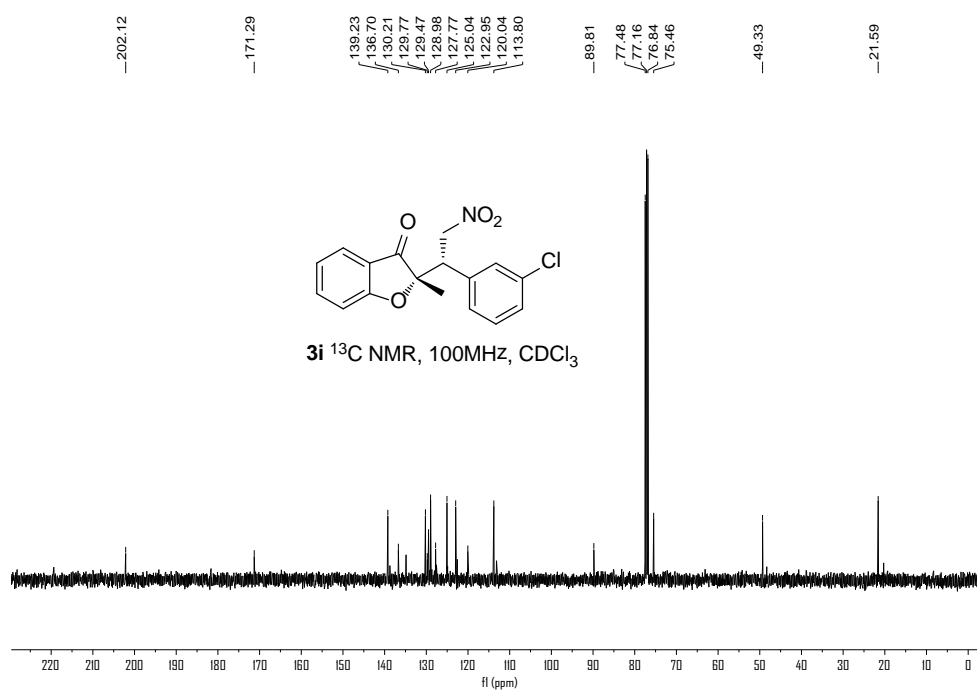

HPLC copies of compound **3i**:

**rac iPrOH/Hex 2/98 IC**

<Chromatogram>

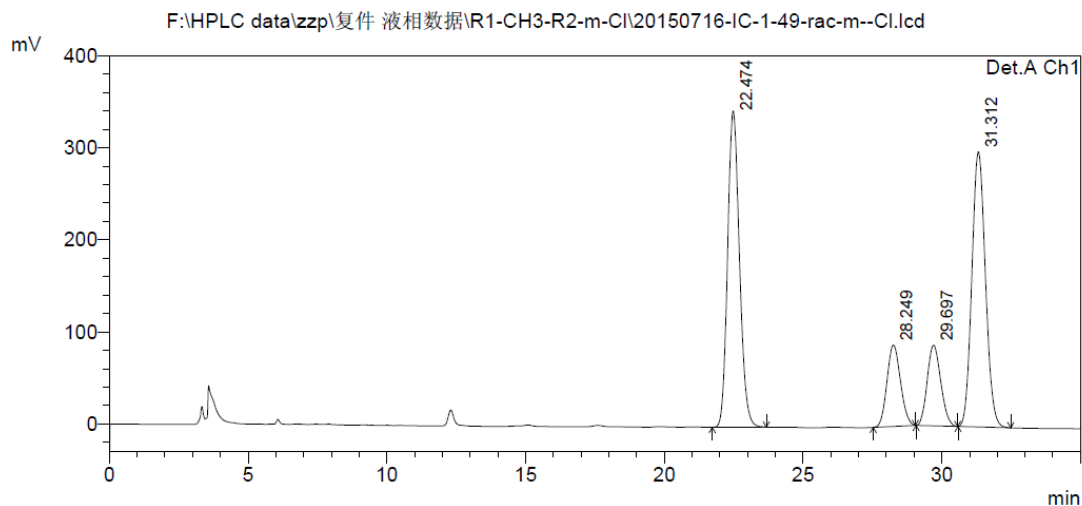

1 Det.A Ch1/210nm

PeakTable

| Peak# | Ret. Time | Area     | Height | Area %  | Height % |
|-------|-----------|----------|--------|---------|----------|
| 1     | 22.474    | 10207632 | 343534 | 38.763  | 41.969   |
| 2     | 28.249    | 2993211  | 88507  | 11.366  | 10.813   |
| 3     | 29.697    | 2970321  | 87625  | 11.280  | 10.705   |
| 4     | 31.312    | 10162559 | 298881 | 38.591  | 36.514   |
| Total |           | 26333723 | 818546 | 100.000 | 100.000  |

**3i iPrOH/Hex 2/98 IC**

<Chromatogram>

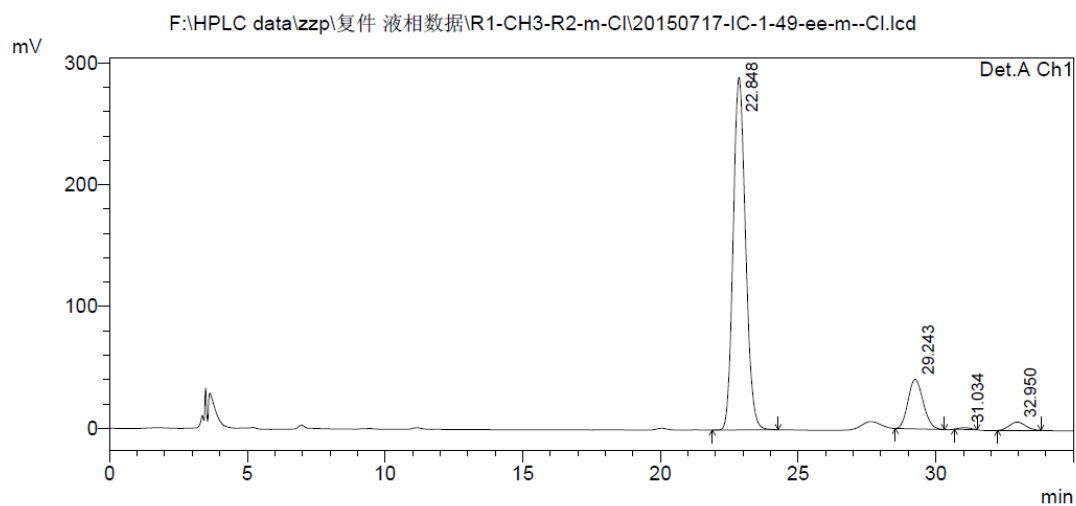

1 Det.A Ch1/210nm

PeakTable

| Peak# | Ret. Time | Area     | Height | Area %  | Height % |
|-------|-----------|----------|--------|---------|----------|
| 1     | 22.848    | 9067694  | 289579 | 82.838  | 85.499   |
| 2     | 29.243    | 1556060  | 40805  | 14.215  | 12.048   |
| 3     | 31.034    | 42949    | 1510   | 0.392   | 0.446    |
| 4     | 32.950    | 279569   | 6799   | 2.554   | 2.008    |
| Total |           | 10946272 | 338694 | 100.000 | 100.000  |

**Compound 3j:** 2-(1-(4-chlorophenyl)-2-nitroethyl)-2-methylbenzofuran-3(2H)-one

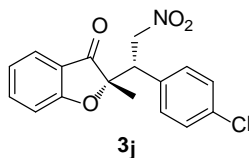

**Compound 3j:** yellow oil, 96% isolated yield.

**<sup>1</sup>H NMR** (400 MHz, CDCl<sub>3</sub>) δ 7.74 – 7.53 (m, 2H), 7.35 (d, *J* = 6.2 Hz, 3H), 7.17 – 6.94 (m, 3H), 4.69 (dd, *J* = 13.1, 11.3 Hz, 1H), 4.38 (dd, *J* = 13.1, 4.1 Hz, 1H), 4.00 (dd, *J* = 11.4, 4.1 Hz, 1H), 1.53 (s, 1H), 1.26 (s, 2H).

**<sup>13</sup>C NMR** (100 MHz, CDCl<sub>3</sub>) δ 202.20, 171.25, 139.21, 134.69, 133.07, 130.77, 130.51, 129.18, 128.78, 125.01, 122.92, 120.04, 113.74, 89.83, 75.52, 49.10, 21.56.

**HRMS (ESI)** calcd for C<sub>17</sub>H<sub>14</sub>ClNO<sub>4</sub> (M+Na)<sup>+</sup>: 354.0509, found: 354.0508.

**HPLC** The enantiomeric excess was determined by HPLC with an IC column at 210 nm (2-propanol: hexane=1:19), 1.0 mL/min; major isomer: *t*<sub>1</sub> = 16.01 min, *t*<sub>2</sub> = 23.56 min; minor isomer: *t*<sub>3</sub> = 18.33 min, *t*<sub>4</sub> = 19.32 min)..

[α]<sub>D</sub><sup>25</sup> -70.1 (c = 0.9, CHCl<sub>3</sub>)



NMR copies of major product of compound **3j**:

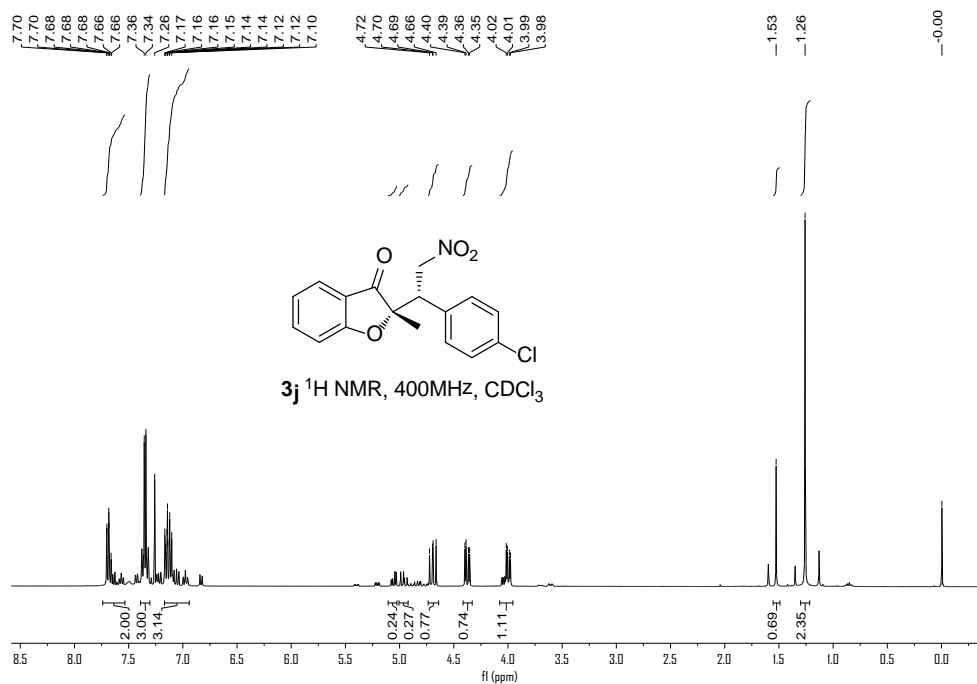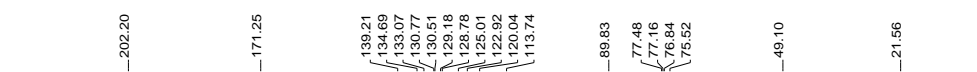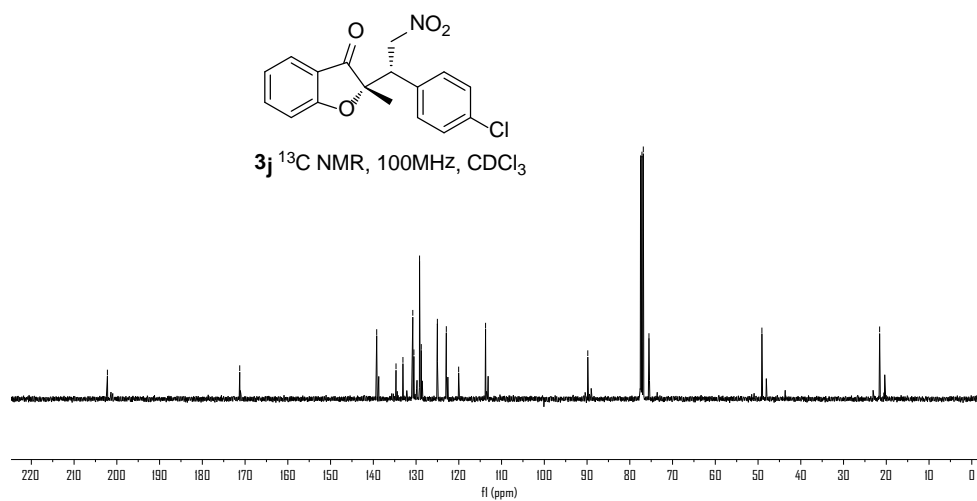

HPLC copies of compound **3j**:

**rac iPrOH/Hex 1/19 IC**

<Chromatogram>

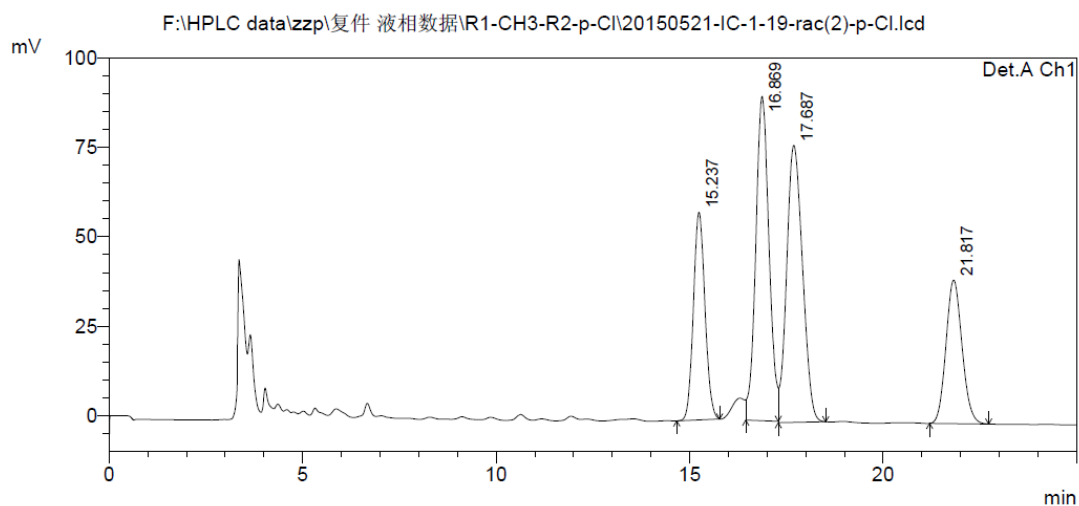

1 Det.A Ch1/210nm

PeakTable

| Peak# | Ret. Time | Area    | Height | Area %  | Height % |
|-------|-----------|---------|--------|---------|----------|
| 1     | 15.237    | 1207110 | 58033  | 17.917  | 21.802   |
| 2     | 16.869    | 2161028 | 90651  | 32.075  | 34.055   |
| 3     | 17.687    | 2211960 | 77415  | 32.831  | 29.083   |
| 4     | 21.817    | 1157270 | 40089  | 17.177  | 15.061   |
| Total |           | 6737368 | 266188 | 100.000 | 100.000  |

**3j iPrOH/Hex 1/19 IC**

<Chromatogram>

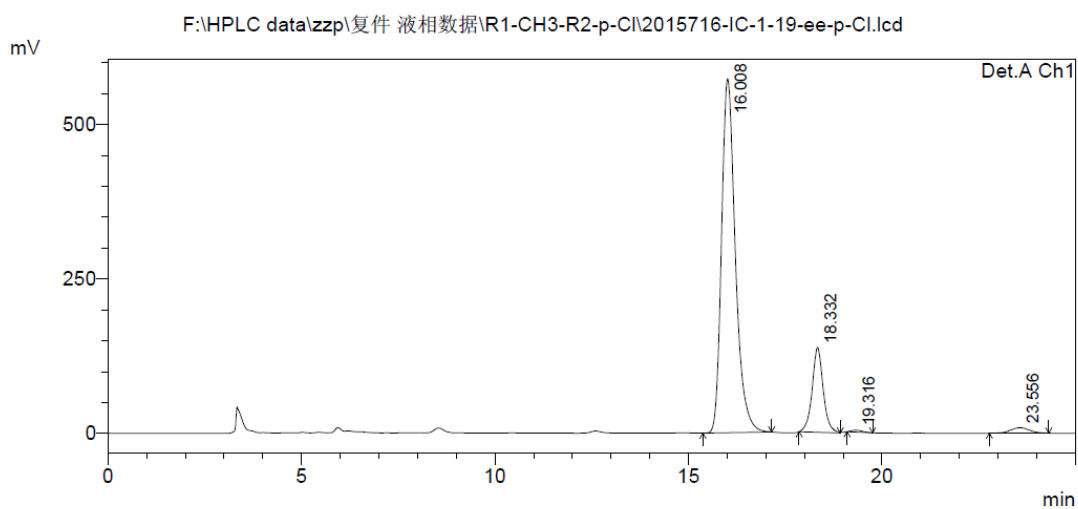

1 Det.A Ch1/210nm

PeakTable

| Peak# | Ret. Time | Area     | Height | Area %  | Height % |
|-------|-----------|----------|--------|---------|----------|
| 1     | 16.008    | 14219887 | 572879 | 82.142  | 79.324   |
| 2     | 18.332    | 2730045  | 137411 | 15.770  | 19.027   |
| 3     | 19.316    | 60813    | 3020   | 0.351   | 0.418    |
| 4     | 23.556    | 300542   | 8893   | 1.736   | 1.231    |
| Total |           | 17311288 | 722203 | 100.000 | 100.000  |

**Compound 3k:** 2-(1-(4-fluorophenyl)-2-nitroethyl)-2-methylbenzofuran-3(2H)-one

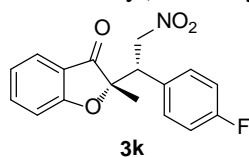

**Compound 3k:** Colorless oil, 99% isolated yield.

**<sup>1</sup>H NMR** (400 MHz, CDCl<sub>3</sub>) δ 7.71 – 6.76 (m, 8H), 4.70 (dd, *J* = 13.0, 11.3 Hz, 1H), 4.39 (dd, *J* = 13.1, 4.2 Hz, 1H), 4.01 (dd, *J* = 11.3, 4.3 Hz, 1H), 1.53 (s, 1H), 1.27 (s, 2H).

**<sup>13</sup>C NMR** (100 MHz, CDCl<sub>3</sub>) δ 202.32, 171.25, 164.04, 139.16, 131.14, 131.06, 124.97, 122.86, 120.08, 116.04, 115.82, 113.71, 113.11, 89.97, 75.68, 48.99, 21.52

**HRMS (ESI)** calcd for C<sub>17</sub>H<sub>14</sub>FNO<sub>4</sub> (M+Na)<sup>+</sup>: 338.0805, found: 338.0802.

**HPLC** The enantiomeric excess was determined by HPLC with an IC column at 210 nm (2-propanol: hexane=1:9), 1.0 mL/min; major isomer: *t*<sub>1</sub> = 10.76 min, *t*<sub>2</sub> = 14.91 min; minor isomer: *t*<sub>3</sub> = 11.63 min, *t*<sub>4</sub> = 11.93 min).

**[α]<sub>D</sub><sup>25</sup>** -43.3 (c = 0.8, CHCl<sub>3</sub>)

NMR copies of major product of compound **3k**:

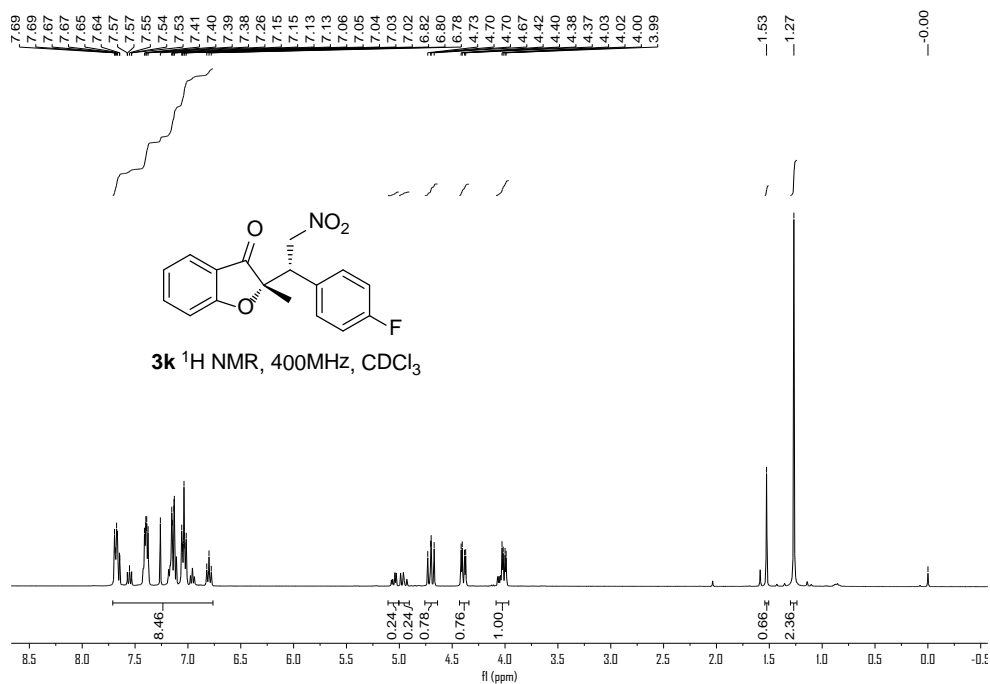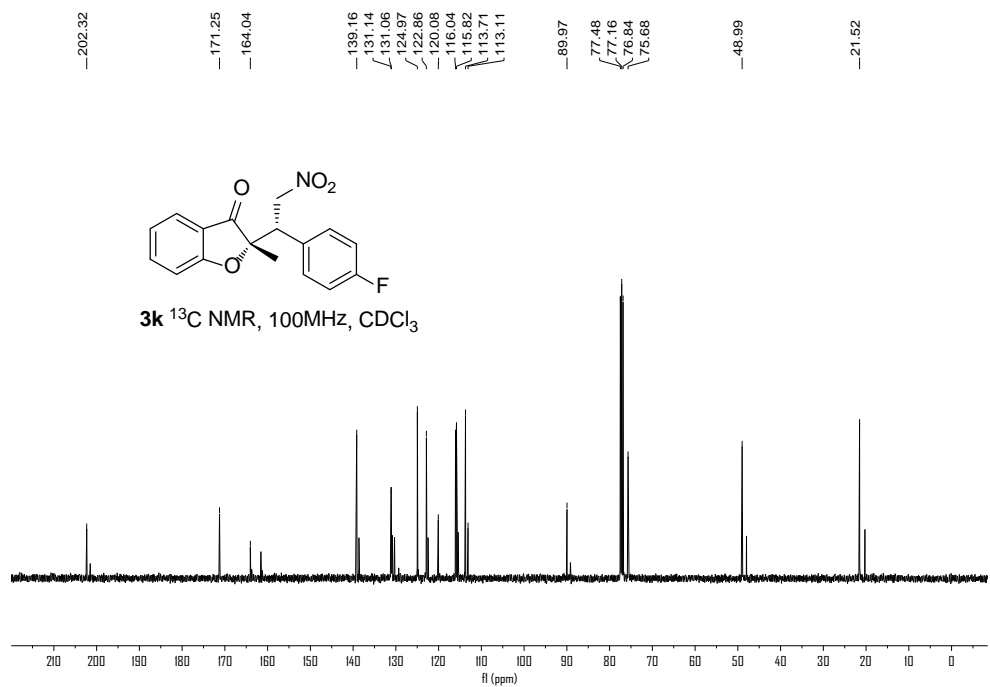

HPLC copies of compound **3k**:

**rac iPrOH/Hex 1/9 IC**

<Chromatogram>

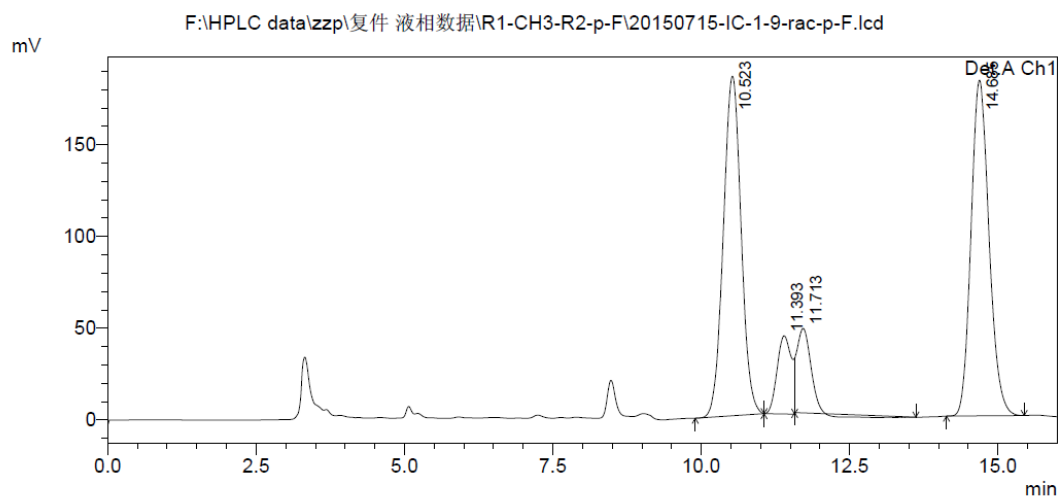

PeakTable

| Peak# | Ret. Time | Area    | Height | Area %  | Height % |
|-------|-----------|---------|--------|---------|----------|
| 1     | 10.523    | 3846931 | 185109 | 42.210  | 40.530   |
| 2     | 11.393    | 732649  | 42645  | 8.039   | 9.337    |
| 3     | 11.713    | 665144  | 46027  | 7.298   | 10.078   |
| 4     | 14.685    | 3869019 | 182938 | 42.453  | 40.055   |
| Total |           | 9113743 | 456718 | 100.000 | 100.000  |

**3k iPrOH/Hex 1/9 IC**

<Chromatogram>

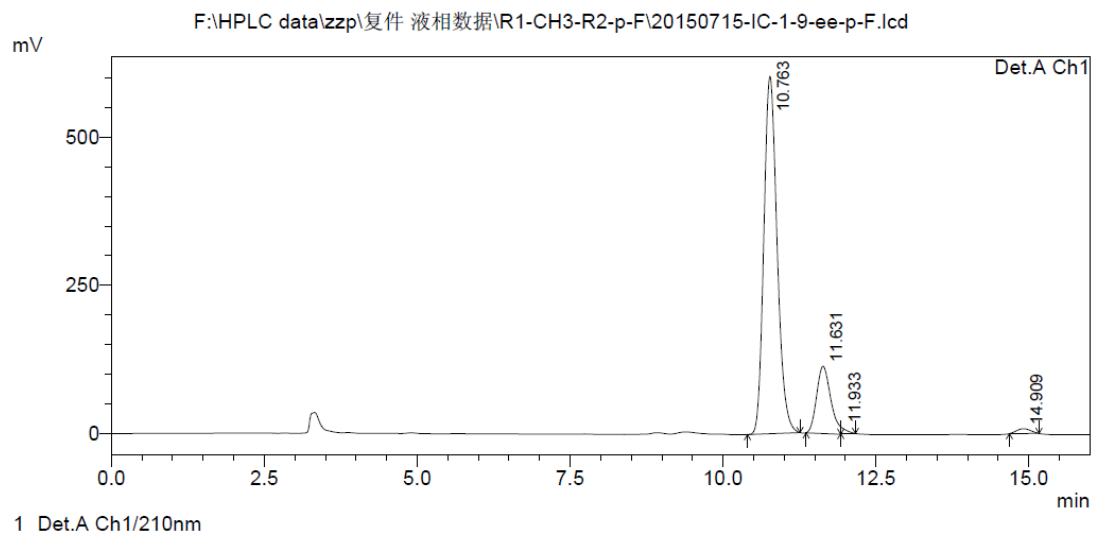

PeakTable

| Peak# | Ret. Time | Area     | Height | Area %  | Height % |
|-------|-----------|----------|--------|---------|----------|
| 1     | 10.763    | 9086554  | 603208 | 82.041  | 82.013   |
| 2     | 11.631    | 1799474  | 113595 | 16.247  | 15.445   |
| 3     | 11.933    | 60924    | 10612  | 0.550   | 1.443    |
| 4     | 14.909    | 128632   | 8086   | 1.161   | 1.099    |
| Total |           | 11075584 | 735500 | 100.000 | 100.000  |

**Compound 3l:** 2-(1-(2,6-dichlorophenyl)-2-nitroethyl)-2-methylbenzofuran-3(2H)-one

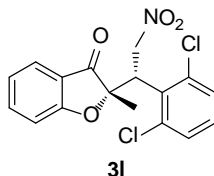

**Compound 3l:** light yellow oil, 87% isolated yield.

**<sup>1</sup>H NMR** (400 MHz, CDCl<sub>3</sub>) δ 7.76 – 7.54 (m, 2H), 7.37 (ddd, *J* = 42.5, 8.2, 1.3 Hz, 2H), 7.24 – 7.04 (m, 3H), 5.40 – 5.26 (m, 2H), 4.65 (dd, *J* = 12.6, 3.4 Hz, 1H), 1.63 (s, 1H), 1.37 (s, 2H).

**<sup>13</sup>C NMR** (100 MHz, CDCl<sub>3</sub>) δ 201.92 , 171.17 , 138.93 , 138.57 , 135.28 , 130.86 , 130.67 , 130.03 , 129.24 , 125.13 , 122.73 , 119.69 , 113.66 , 89.72 , 73.03 , 45.43 , 21.38

**HRMS (ESI)** calcd for C<sub>17</sub>H<sub>13</sub>Cl<sub>2</sub>NO<sub>4</sub> (M+Na)<sup>+</sup>: 388.0119, found: 388.0118.

**HPLC** The enantiomeric excess was determined by HPLC with an IC column at 210 nm (2-propanol: hexane=1:9), 1.0 mL/min; major isomer: *t*<sub>1</sub> = 17.65 min, *t*<sub>2</sub> = 18.64 min; minor isomer: *t*<sub>3</sub> = 14.30 min, *t*<sub>4</sub> = 15.36 min)

**[α]<sub>D</sub><sup>25</sup>** -31.3 (c = 0.5, CHCl<sub>3</sub>)

NMR copies of major product of compound **31**:

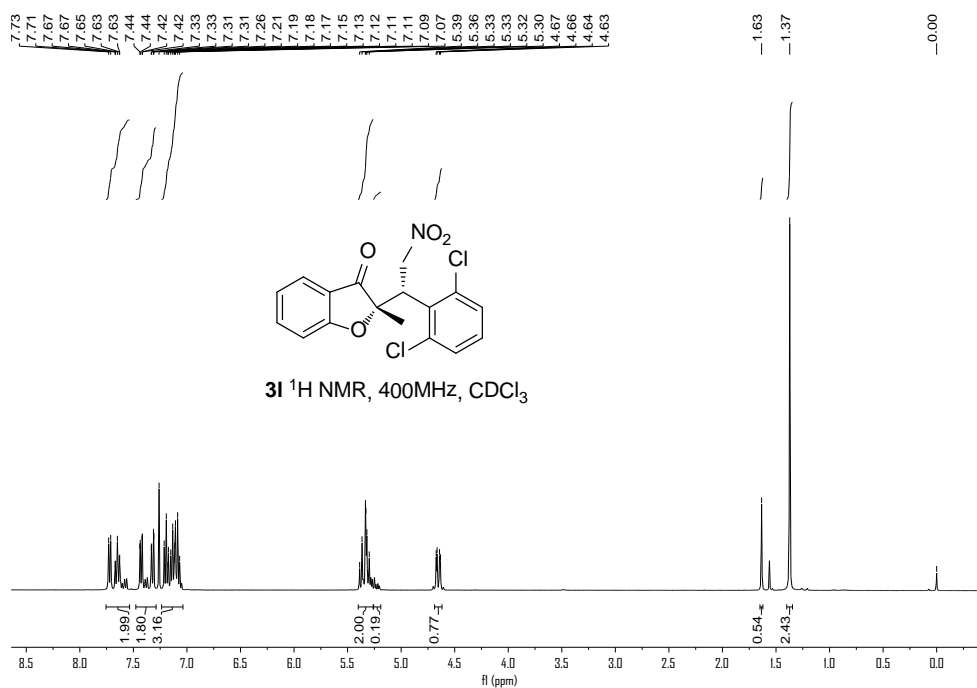

—201.92

—171.17

138.93  
138.57  
135.28  
130.86  
130.67  
130.03  
129.24  
125.13  
122.73  
119.69  
113.66

—89.72

77.48  
77.16  
76.84  
73.03

—45.43

—21.38

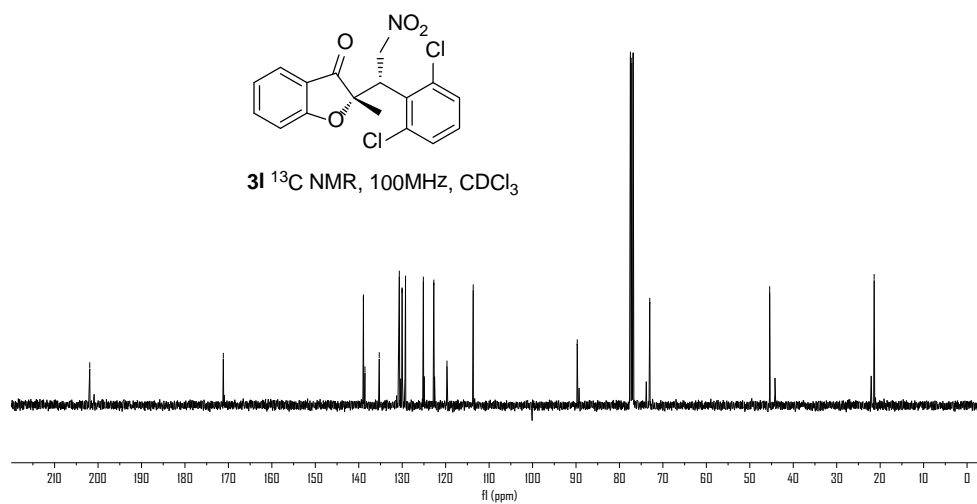

HPLC copies of compound **3I**:

**rac iPrOH/Hex 1/9 IC**

<Chromatogram>

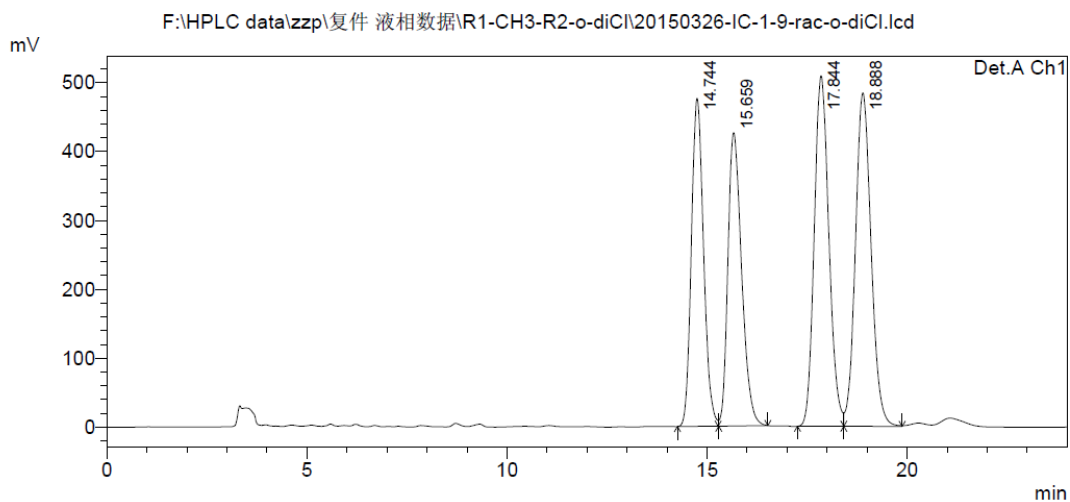

PeakTable

| Peak# | Ret. Time | Area     | Height  | Area %  | Height % |
|-------|-----------|----------|---------|---------|----------|
| 1     | 14.744    | 10089769 | 476001  | 21.736  | 25.132   |
| 2     | 15.659    | 10155206 | 425581  | 21.877  | 22.470   |
| 3     | 17.844    | 12983764 | 508622  | 27.970  | 26.854   |
| 4     | 18.888    | 13191426 | 483790  | 28.417  | 25.543   |
| Total |           | 46420165 | 1893994 | 100.000 | 100.000  |

**3I iPrOH/Hex 1/9 IC**

<Chromatogram>

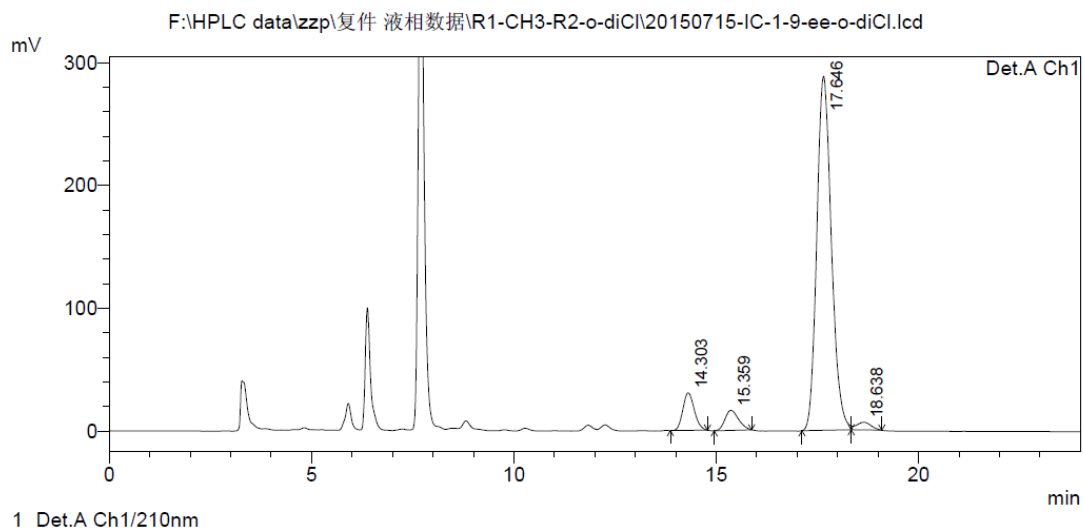

PeakTable

| Peak# | Ret. Time | Area    | Height | Area %  | Height % |
|-------|-----------|---------|--------|---------|----------|
| 1     | 14.303    | 600659  | 30615  | 7.177   | 8.960    |
| 2     | 15.359    | 380986  | 16434  | 4.552   | 4.809    |
| 3     | 17.646    | 7226135 | 288340 | 86.339  | 84.385   |
| 4     | 18.638    | 161743  | 6309   | 1.933   | 1.846    |
| Total |           | 8369524 | 341697 | 100.000 | 100.000  |



**Compound 3m:** 2-methyl-2-(1-(naphthalen-2-yl)-2-nitroethyl)benzofuran-3(2H)-one

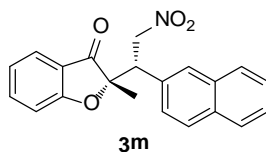

**Compound 3m:** light yellow solid, 86% isolated yield.

**<sup>1</sup>H NMR** (400 MHz, CDCl<sub>3</sub>) δ 7.86 (s, 3H), 7.70 (dd, *J* = 21.3, 7.9 Hz, 2H), 7.61 (dd, *J* = 8.5, 1.8 Hz, 1H), 7.55 – 7.30 (m, 3H), 7.24 – 6.82 (m, 2H), 5.13 (s, 1H), 4.44 (dd, *J* = 13.0, 4.0 Hz, 1H), 4.20 (dd, *J* = 10.6, 3.4 Hz, 1H), 1.58 (s, 1H), 1.28 (s, 2H).

**<sup>13</sup>C NMR** (100 MHz, CDCl<sub>3</sub>) δ 202.56, 171.37, 139.12, 138.52, 133.27, 133.24, 132.05, 129.23, 128.84, 128.16, 127.78, 127.54, 126.59, 125.00, 122.82, 120.09, 113.79, 90.37, 75.80, 49.85, 21.71

**HRMS (ESI)** calcd for C<sub>21</sub>H<sub>17</sub>NO<sub>4</sub> (M+Na)<sup>+</sup>: 370.1055, found: 370.1055.

**HPLC** The enantiomeric excess was determined by HPLC with an AD-H column at 210 nm (2-propanol: hexane=1:19), 1.0 mL/min; major isomer: *t*<sub>1</sub> = 15.71 min, *t*<sub>2</sub> = 25.99 min; minor isomer: *t*<sub>3</sub> = 17.92 min, *t*<sub>4</sub> = 27.53 min).

**[α]<sub>D</sub><sup>25</sup>** -331.4 (c = 0.6, CHCl<sub>3</sub>)

NMR copies of major product of compound **3m**:

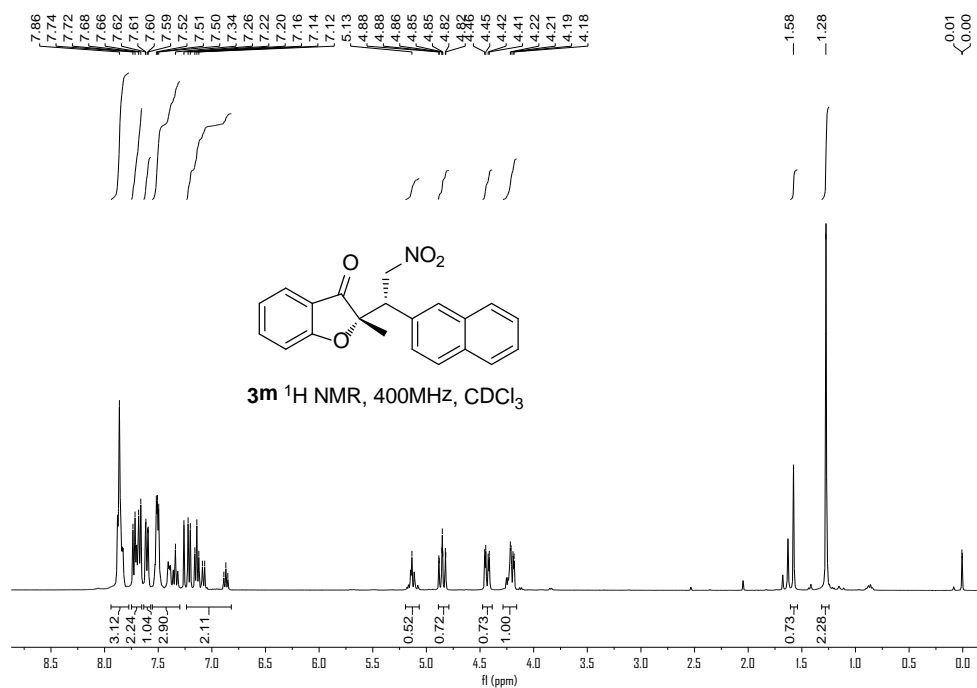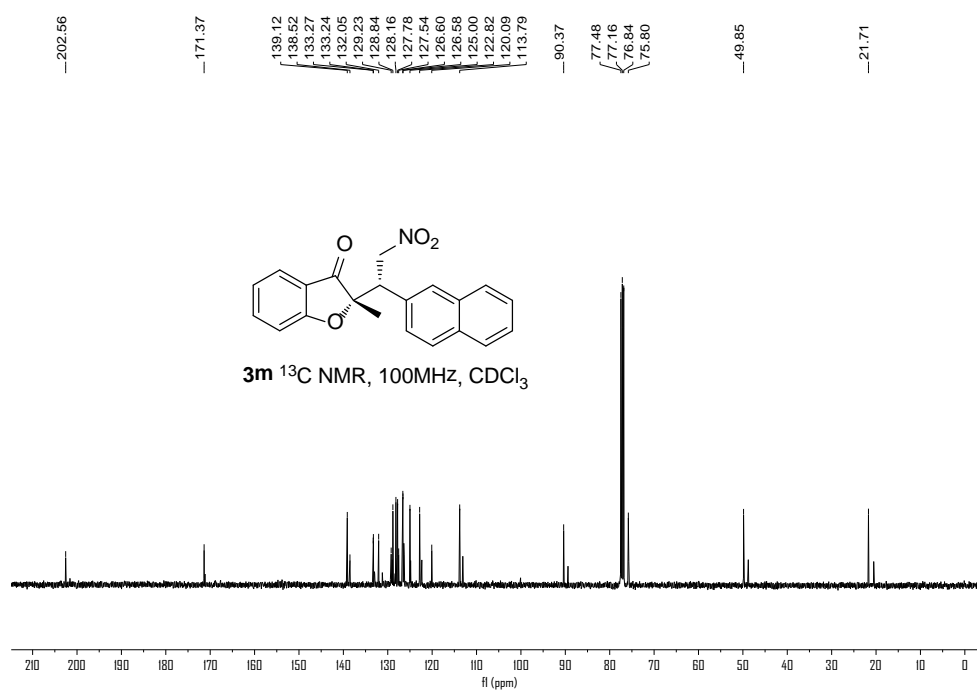

HPLC copies of compound **3m**:

**rac iPrOH/Hex 1/19 AD-H**

<Chromatogram>

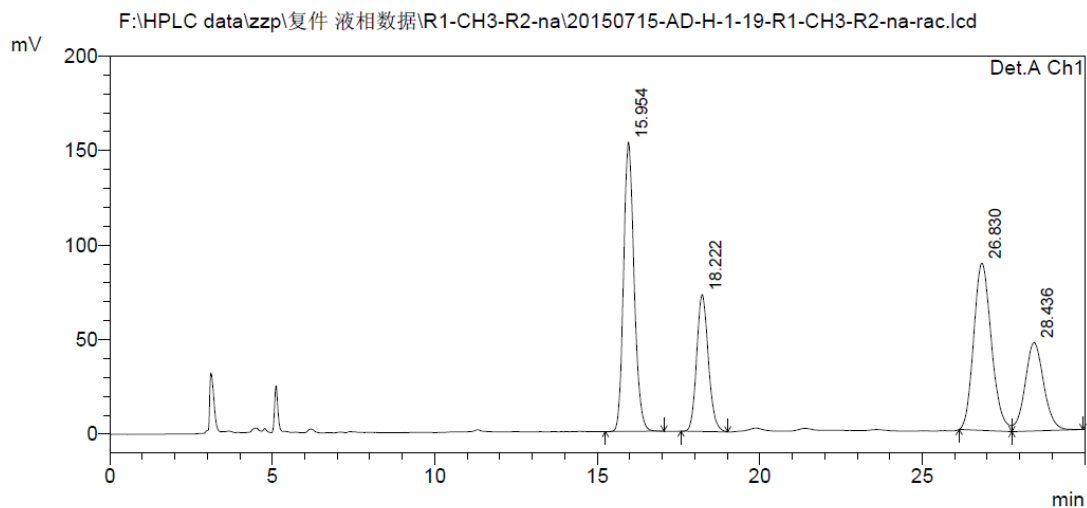

PeakTable

| Peak# | Ret. Time | Area     | Height | Area %  | Height % |
|-------|-----------|----------|--------|---------|----------|
| 1     | 15.954    | 3452541  | 153007 | 32.931  | 42.426   |
| 2     | 18.222    | 1808730  | 72461  | 17.252  | 20.092   |
| 3     | 26.830    | 3357392  | 88444  | 32.024  | 24.524   |
| 4     | 28.436    | 1865357  | 46734  | 17.792  | 12.958   |
| Total |           | 10484020 | 360646 | 100.000 | 100.000  |

**3m iPrOH/Hex 1/19 AD-H**

<Chromatogram>

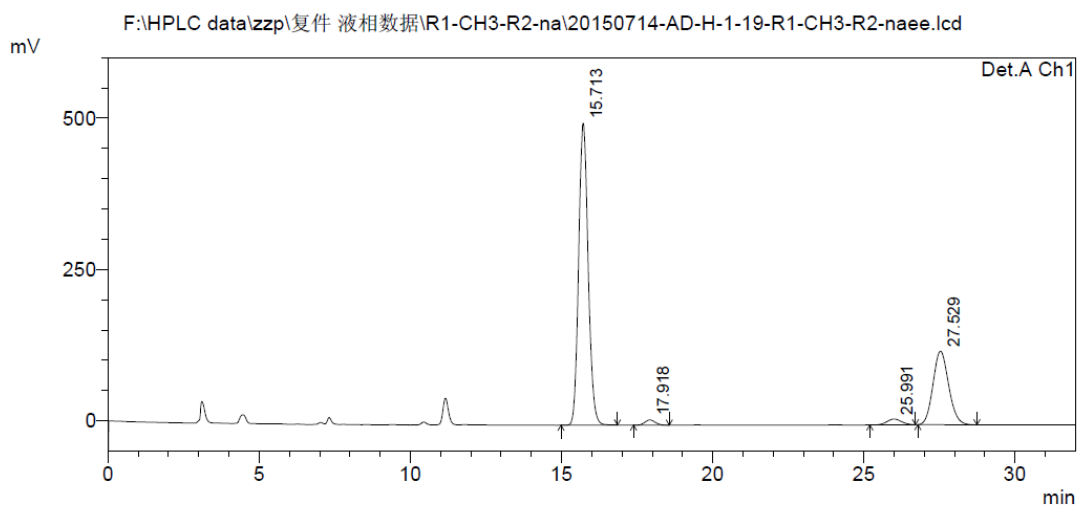

PeakTable

| Peak# | Ret. Time | Area     | Height | Area %  | Height % |
|-------|-----------|----------|--------|---------|----------|
| 1     | 15.713    | 10882809 | 498831 | 68.975  | 78.113   |
| 2     | 17.918    | 203150   | 8560   | 1.288   | 1.340    |
| 3     | 25.991    | 319311   | 9628   | 2.024   | 1.508    |
| 4     | 27.529    | 4372539  | 121585 | 27.713  | 19.039   |
| Total |           | 15777809 | 638604 | 100.000 | 100.000  |

**Compound 3n:** 2-methyl-2-(2-nitro-1-(thiophen-2-yl)ethyl)benzofuran-3(2H)-one

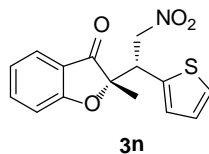

**Compound 3n:** brown oil, 92% isolated yield.

**<sup>1</sup>H NMR** (400 MHz, CDCl<sub>3</sub>) δ 7.71 – 7.27 (m, 3H), 7.22 – 7.03 (m, 3H), 6.97 (dd, *J* = 5.1, 3.5 Hz, 1H), 4.63 (dd, *J* = 13.5, 11.8 Hz, 1H), 4.42 – 4.38 (m, 1H), 4.38 – 4.33 (m, 1H), 1.55 (s, 1H), 1.36 (s, 2H).

**<sup>13</sup>C NMR** (100 MHz, CDCl<sub>3</sub>) δ 201.99, 171.35, 139.15, 136.05, 128.79, 127.01, 126.49, 126.21, 124.99, 122.88, 120.20, 89.71, 76.55, 45.38, 21.33

**HRMS (ESI)** calcd for C<sub>15</sub>H<sub>13</sub>NO<sub>4</sub>S (M+Na)<sup>+</sup>: 326.0463, found: 326.0460.

**HPLC** The enantiomeric excess was determined by HPLC with an AD-H column at 210 nm (2-propanol: hexane=1:19), 1.0 mL/min; major isomer: *t*<sub>1</sub> = 12.03 min, *t*<sub>2</sub> = 14.82 min; minor isomer: *t*<sub>3</sub> = 14.13 min, *t*<sub>4</sub> = 16.14 min).

**[α]<sub>D</sub><sup>25</sup>** -60.0 (c = 0.6, CHCl<sub>3</sub>)

NMR copies of major product of compound **3n**:

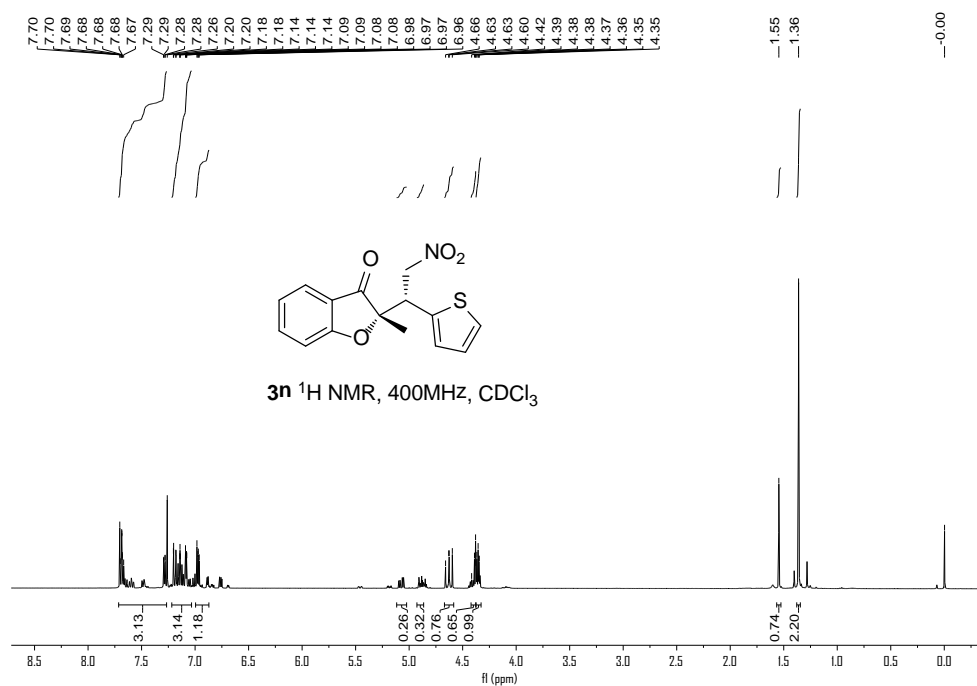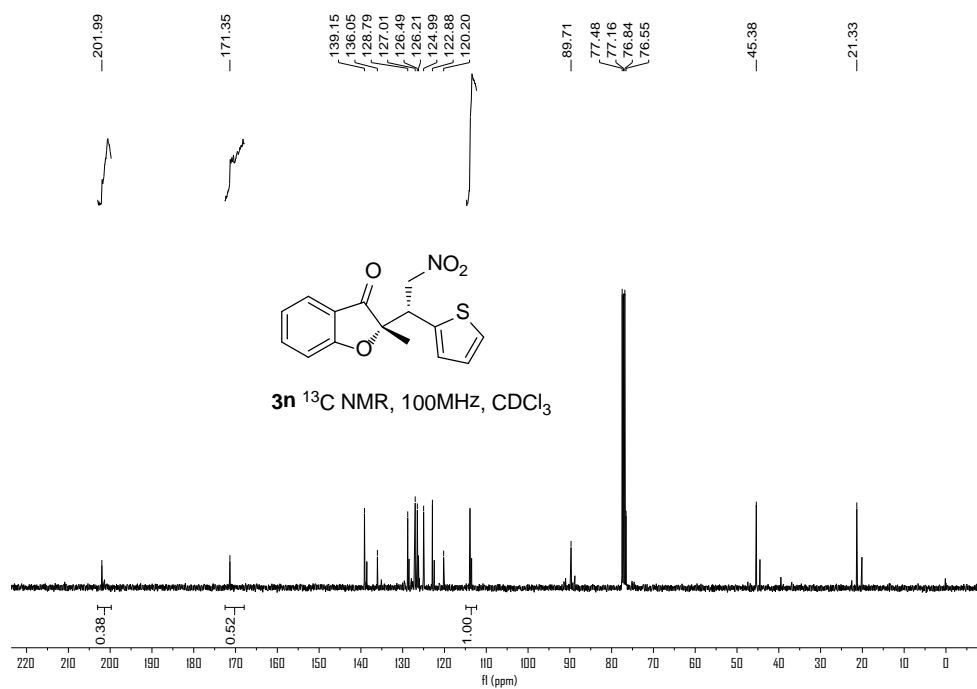

HPLC copies of compound **3n**:

**rac iPrOH/Hex 1/19 AD-H**

<Chromatogram>

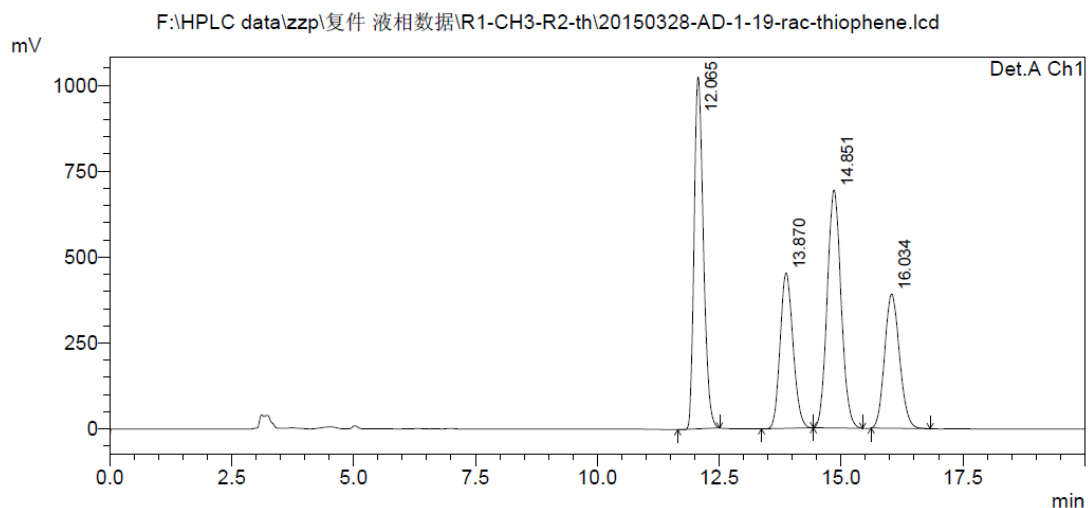

1 Det.A C

PeakTable

Detector A Ch1 210nm

| Peak# | Ret. Time | Area     | Height  | Area %  | Height % |
|-------|-----------|----------|---------|---------|----------|
| 1     | 12.065    | 13544962 | 1024038 | 30.860  | 40.004   |
| 2     | 13.870    | 8302731  | 452342  | 18.916  | 17.671   |
| 3     | 14.851    | 13711949 | 692470  | 31.240  | 27.051   |
| 4     | 16.034    | 8332220  | 390983  | 18.984  | 15.274   |
| Total |           | 43891863 | 2559833 | 100.000 | 100.000  |

**3n iPrOH/Hex 1/19 AD-H**

<Chromatogram>

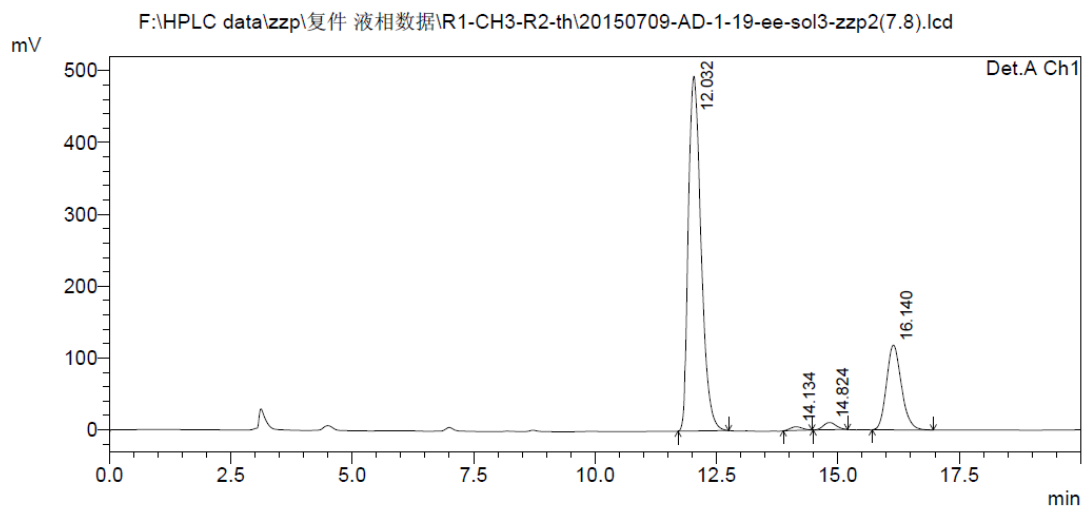

1 Det.A Ch1/210nm

PeakTable

Detector A Ch1 210nm

| Peak# | Ret. Time | Area     | Height | Area %  | Height % |
|-------|-----------|----------|--------|---------|----------|
| 1     | 12.032    | 9001929  | 493982 | 76.329  | 78.746   |
| 2     | 14.134    | 88561    | 5160   | 0.751   | 0.823    |
| 3     | 14.824    | 184878   | 10132  | 1.568   | 1.615    |
| 4     | 16.140    | 2518240  | 118034 | 21.353  | 18.816   |
| Total |           | 11793609 | 627308 | 100.000 | 100.000  |

**Compound 3o:** 2-ethyl-2-(2-nitro-1-phenylethyl)benzofuran-3(2H)-one

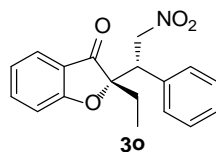

**Compound 3o:** Colorless oil, 99% isolated yield.

**<sup>1</sup>H NMR** (400 MHz, CDCl<sub>3</sub>) δ 7.74 – 7.28 (m, 6H), 7.20 – 6.90 (m, 3H), 4.74 (dd, *J* = 13.0, 11.3 Hz, 1H), 4.39 (dd, *J* = 13.0, 4.1 Hz, 1H), 4.03 (dd, *J* = 11.3, 4.1 Hz, 1H), 2.05 – 1.60 (m, 2H), 0.72 (dt, *J* = 47.8, 7.4 Hz, 3H).

**<sup>13</sup>C NMR** (100 MHz, CDCl<sub>3</sub>) δ 202.77 , 172.30 , 139.05 , 134.59 , 129.46 , 129.36 , 128.84 , 128.58 , 128.45 , 124.36 , 122.58 , 121.83 , 113.30 , 93.10 , 75.81 , 49.55 , 28.90 , 7.00 .

**HRMS (ESI)** calcd for C<sub>18</sub>H<sub>17</sub>NO<sub>4</sub> (M+Na)<sup>+</sup>: 334.1055, found: 334.1052.

**HPLC** The enantiomeric excess was determined by HPLC with an AD-H column at 210 nm (2-propanol: hexane=1:19), 1.0 mL/min; major isomer: *t*<sub>1</sub> = 11.87 min, *t*<sub>2</sub> = 15.49 min; minor isomer: *t*<sub>3</sub> = 11.25 min, *t*<sub>4</sub> = 14.10 min).

[α]<sub>D</sub><sup>25</sup> -170.8 (c = 0.9, CHCl<sub>3</sub>)

NMR copies of major product of compound **3o**:

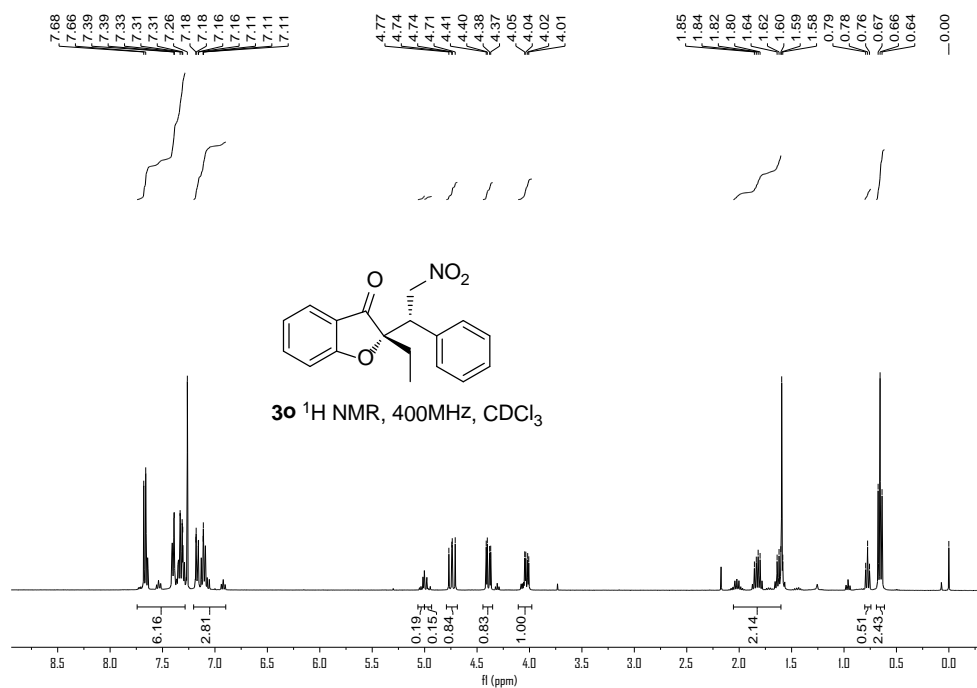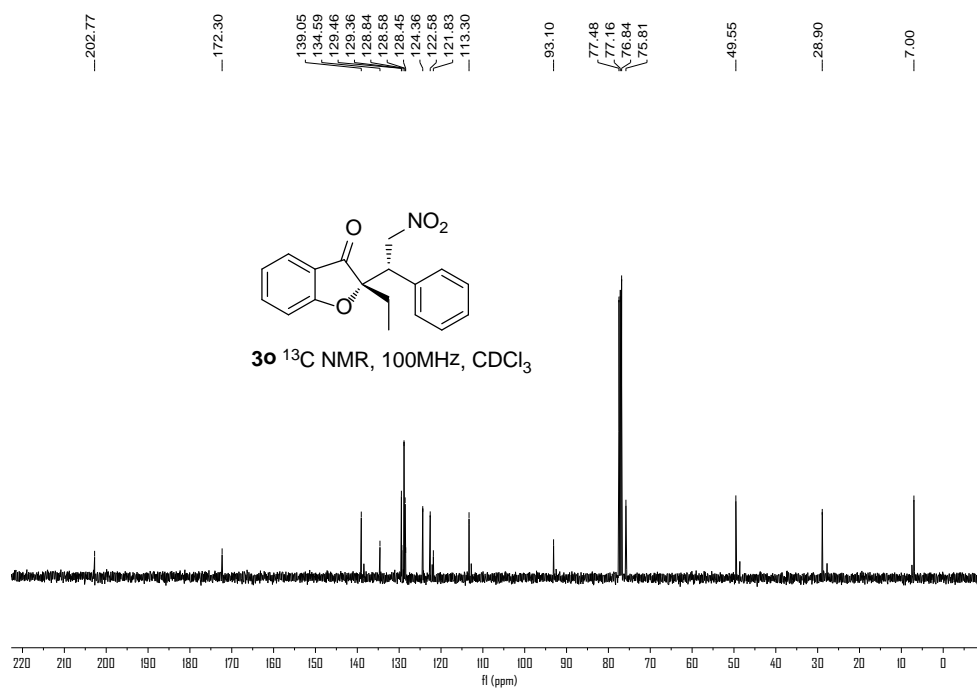



HPLC copies of compound **3o**:

**rac iPrOH/Hex 1/9 IC**

<Chromatogram>

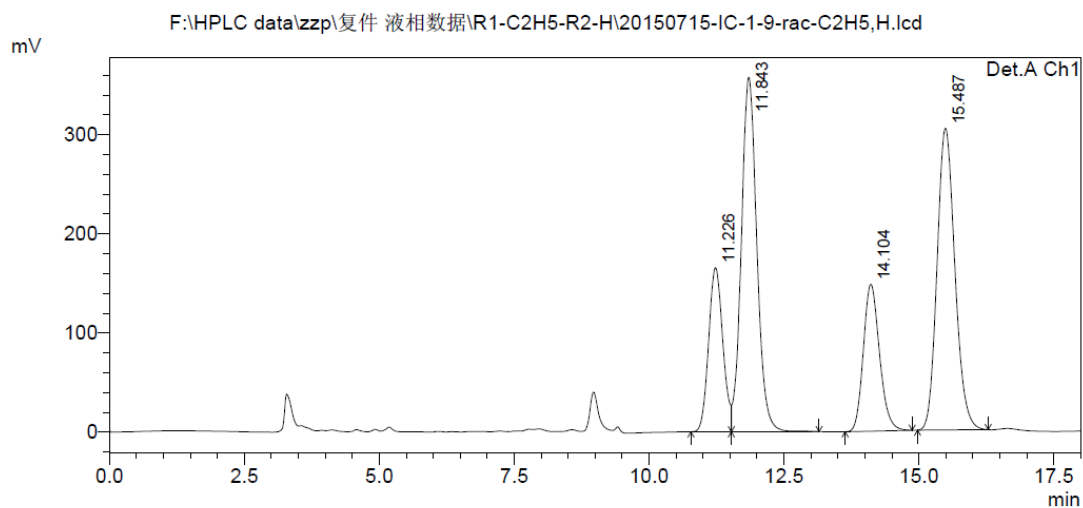

PeakTable

| Peak# | Ret. Time | Area     | Height | Area %  | Height % |
|-------|-----------|----------|--------|---------|----------|
| 1     | 11.226    | 3037215  | 165656 | 14.987  | 16.971   |
| 2     | 11.843    | 7135451  | 357802 | 35.209  | 36.655   |
| 3     | 14.104    | 3092352  | 148211 | 15.259  | 15.183   |
| 4     | 15.487    | 7001071  | 304463 | 34.546  | 31.191   |
| Total |           | 20266089 | 976133 | 100.000 | 100.000  |

**3o iPrOH/Hex 1/9 IC**

<Chromatogram>

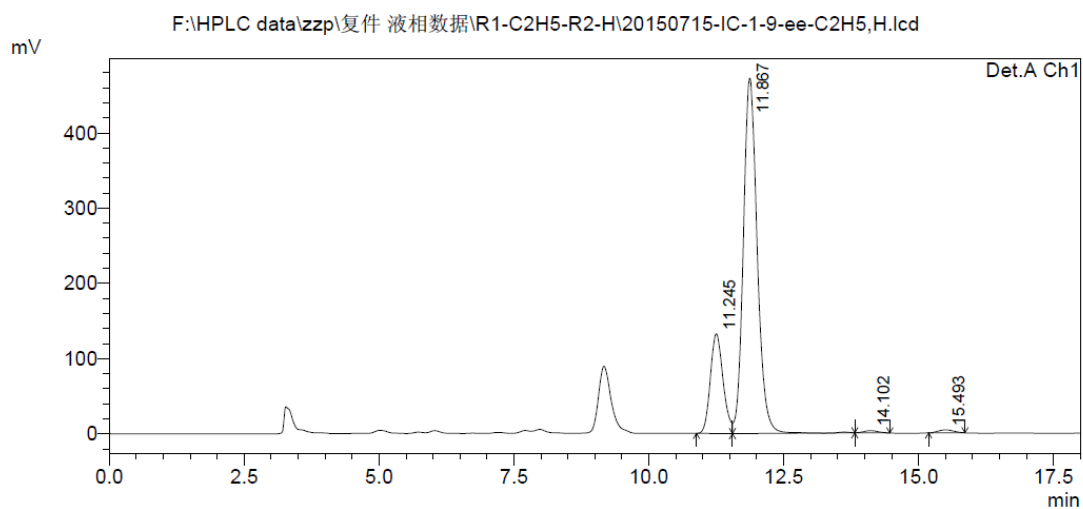

PeakTable

| Peak# | Ret. Time | Area     | Height | Area %  | Height % |
|-------|-----------|----------|--------|---------|----------|
| 1     | 11.245    | 2174319  | 132610 | 20.301  | 21.679   |
| 2     | 11.867    | 8403674  | 472138 | 78.464  | 77.183   |
| 3     | 14.102    | 52222    | 2930   | 0.488   | 0.479    |
| 4     | 15.493    | 80038    | 4033   | 0.747   | 0.659    |
| Total |           | 10710254 | 611711 | 100.000 | 100.000  |

**Compound 3p:** 2-(1-(2-bromophenyl)-2-nitroethyl)-2-ethylbenzofuran-3(2H)-one

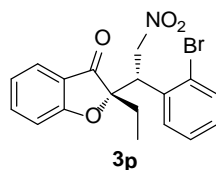

**Compound 3p:** yellow oil, 95% isolated yield.

**<sup>1</sup>H NMR** (400 MHz, CDCl<sub>3</sub>) δ 7.71 – 7.08 (m, 8H), 4.91 – 4.84 (m, 1H), 4.72 (t, *J* = 12.2 Hz, 1H), 4.44 (dd, *J* = 13.1, 3.8 Hz, 1H), 2.03 (dd, *J* = 14.3, 7.2 Hz, 1H), 1.61 (dd, *J* = 14.3, 7.2 Hz, 1H), 0.63 (t, *J* = 7.3 Hz, 3H).

**<sup>13</sup>C NMR** (100 MHz, CDCl<sub>3</sub>) δ 202.24 , 172.18 , 139.13 , 134.48 , 133.60 , 129.83 , 128.84 , 127.96 , 127.22 , 124.36 , 122.66 , 121.76 , 113.16 , 93.20 , 75.25 , 47.08 , 28.19 , 7.01

**HRMS (ESI)** calcd for C<sub>18</sub>H<sub>16</sub>BrNO<sub>4</sub> (M+Na)<sup>+</sup>: 412.0160, found: 412.0155.

**HPLC** The enantiomeric excess was determined by HPLC with an OD-H column at 210 nm (2-propanol: hexane=1:9), 1.0 mL/min; major isomer: *t*<sub>1</sub> = 10.05 min, *t*<sub>2</sub> = 13.79 min; minor isomer: *t*<sub>3</sub> = 12.15 min, *t*<sub>4</sub> = 12.48 min).

**[α]<sub>D</sub><sup>25</sup>** -216.2 (c = 1.0, CHCl<sub>3</sub>)

NMR copies of major product of compound **3p**:

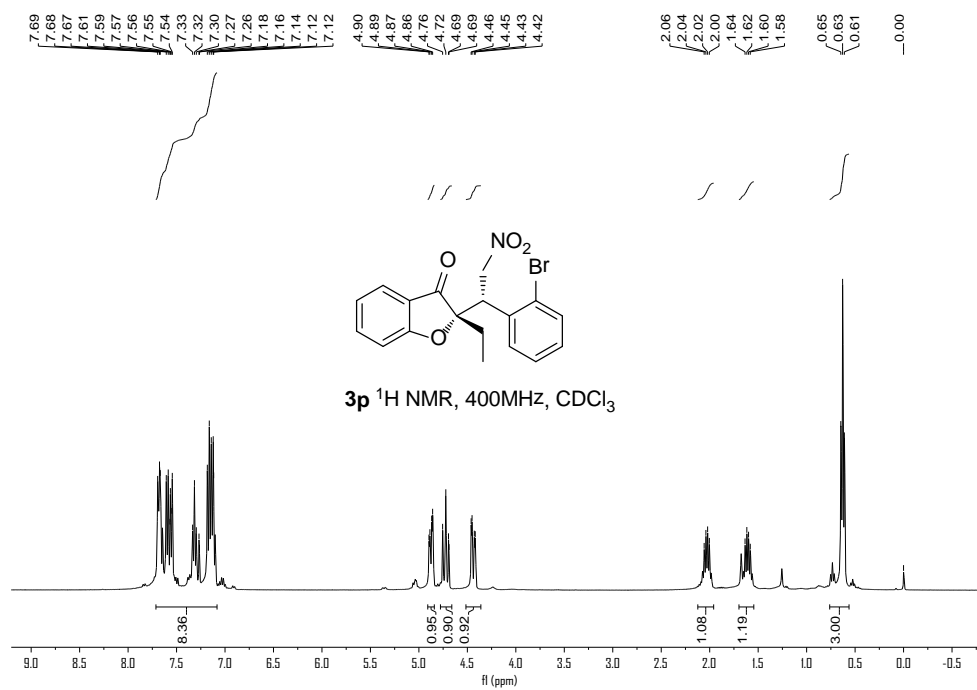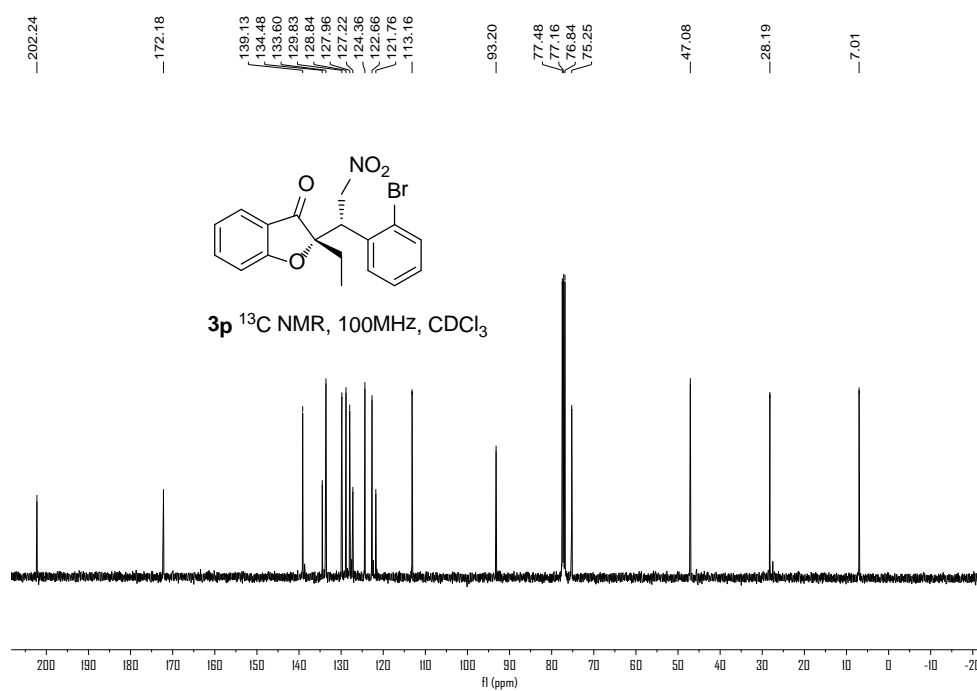

HPLC copies of compound **3p**:

**rac iPrOH/Hex 1/9 OD-H**

<Chromatogram>

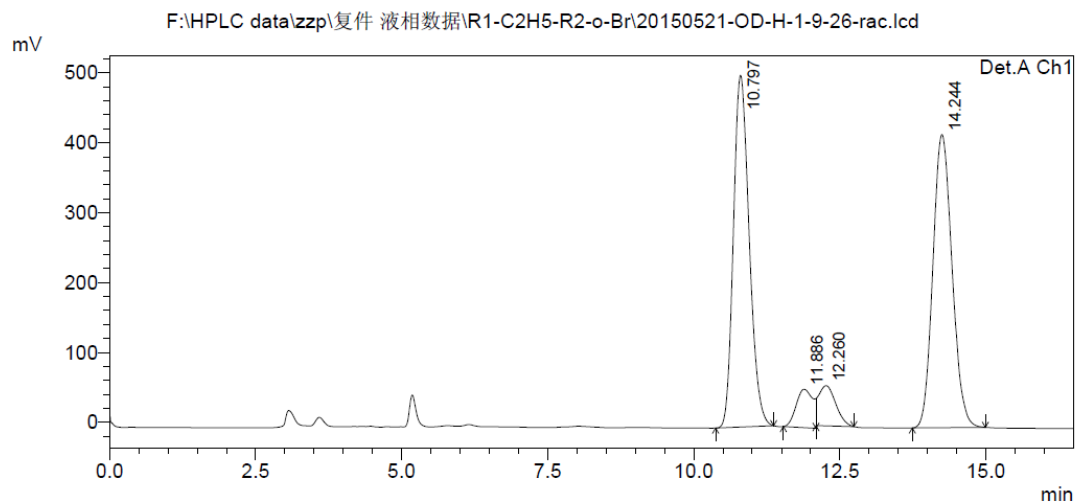

PeakTable

| Peak# | Ret. Time | Area     | Height  | Area %  | Height % |
|-------|-----------|----------|---------|---------|----------|
| 1     | 10.797    | 9477445  | 503709  | 44.434  | 48.616   |
| 2     | 11.886    | 1104623  | 54998   | 5.179   | 5.308    |
| 3     | 12.260    | 1172758  | 57574   | 5.498   | 5.557    |
| 4     | 14.244    | 9574449  | 419806  | 44.889  | 40.518   |
| Total |           | 21329275 | 1036087 | 100.000 | 100.000  |

**3p iPrOH/Hex 1/9 OD-H**

<Chromatogram>

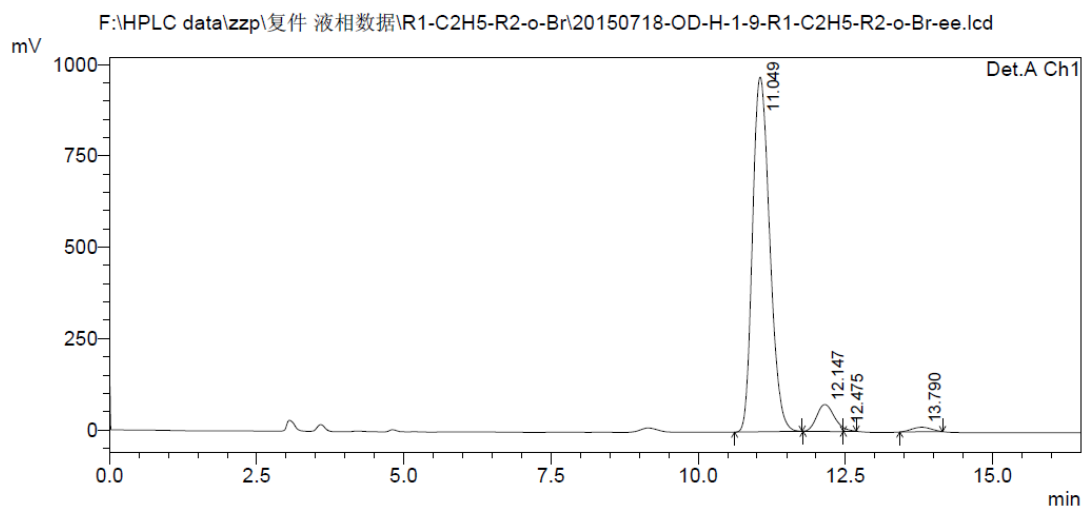

PeakTable

| Peak# | Ret. Time | Area     | Height  | Area %  | Height % |
|-------|-----------|----------|---------|---------|----------|
| 1     | 11.049    | 19693054 | 970700  | 91.492  | 91.106   |
| 2     | 12.147    | 1505242  | 73723   | 6.993   | 6.919    |
| 3     | 12.475    | 42278    | 8701    | 0.196   | 0.817    |
| 4     | 13.790    | 283805   | 12333   | 1.319   | 1.157    |
| Total |           | 21524379 | 1065457 | 100.000 | 100.000  |

**Compound 3q:** 2-(1-(3-bromophenyl)-2-nitroethyl)-2-ethylbenzofuran-3(2H)-one

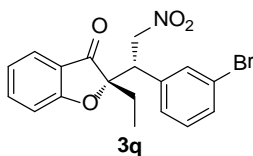

**Compound 3q:** yellow solid, 62% isolated yield.

**<sup>1</sup>H NMR** (400 MHz, CDCl<sub>3</sub>) δ 7.72 – 7.30 (m, 5H), 7.24 – 6.92 (m, 3H), 4.70 (dd, *J* = 13.0, 11.3, 1.4 Hz, 1H), 4.43 – 4.34 (m, 1H), 3.99 (dd, *J* = 11.2, 4.0 Hz, 1H), 2.10 – 1.56 (m, 2H), 0.84 – 0.62 (m, 3H).

**<sup>13</sup>C NMR** (100 MHz, CDCl<sub>3</sub>) δ 202.31 , 172.21 , 139.21 , 136.97 , 132.39 , 131.81 , 130.36 , 128.16 , 124.40 , 122.91 , 122.76 , 121.67 , 113.34 , 92.67 , 75.48 , 49.11 , 28.89 , 6.98.

**HRMS (ESI)** calcd for C<sub>18</sub>H<sub>16</sub>BrNO<sub>4</sub> (M+Na)<sup>+</sup>: 412.0160, found: 412.0157.

**HPLC** The enantiomeric excess was determined by HPLC with an IC column at 210 nm (2-propanol: hexane=1:9), 1.0 mL/min; major isomer: *t*<sub>1</sub> = 9.91 min, *t*<sub>2</sub> = 13.07 min; minor isomer: *t*<sub>3</sub> = 11.14 min, *t*<sub>4</sub> = 12.30 min).

**[α]<sub>D</sub><sup>25</sup>** -96.9 (c = 0.2, CHCl<sub>3</sub>)

NMR copies of major product of compound **3q**:

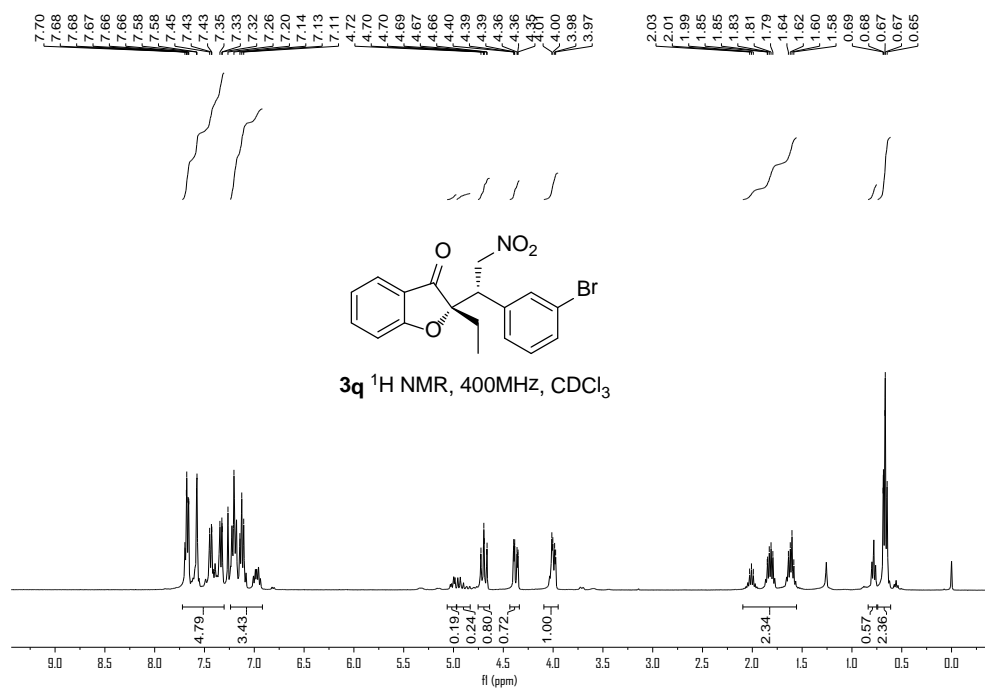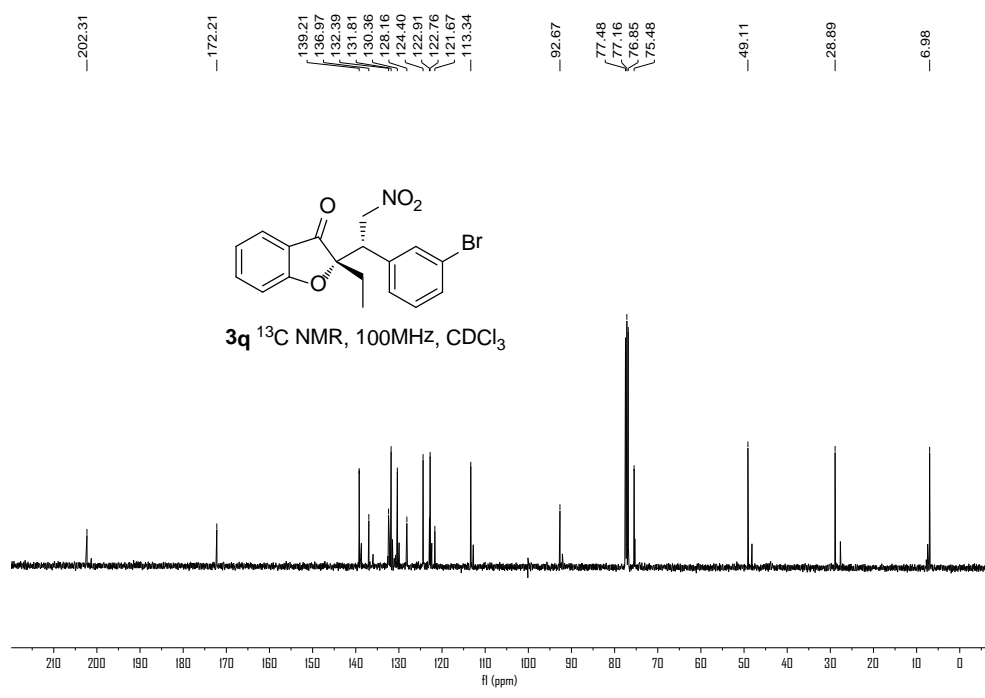

HPLC copies of compound **3q**:

**rac iPrOH/Hex 1/9 IC**

<Chromatogram>

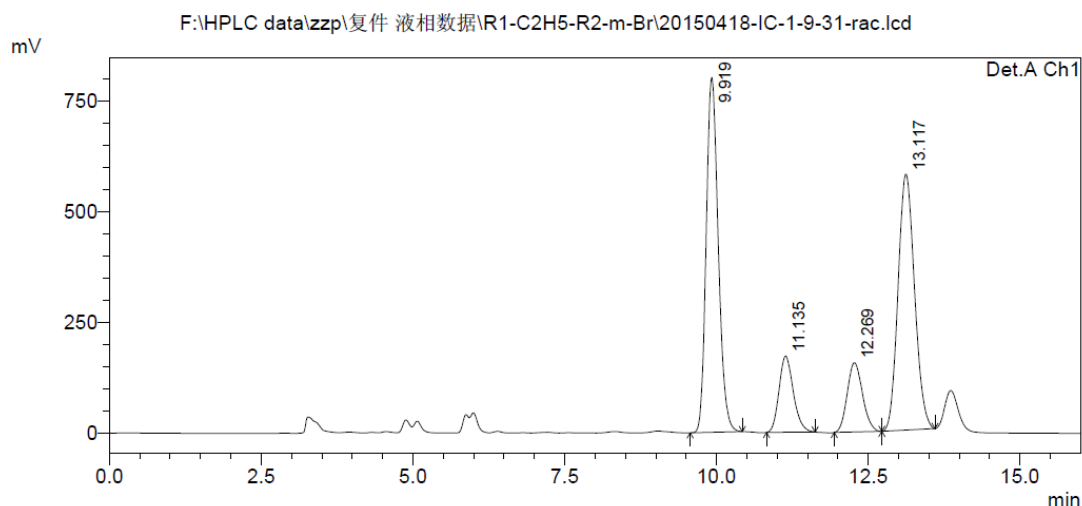

PeakTable

| Peak# | Ret. Time | Area     | Height  | Area %  | Height % |
|-------|-----------|----------|---------|---------|----------|
| 1     | 9.919     | 11039426 | 800510  | 40.142  | 46.931   |
| 2     | 11.135    | 2825819  | 171755  | 10.275  | 10.069   |
| 3     | 12.269    | 2736720  | 156214  | 9.951   | 9.158    |
| 4     | 13.117    | 10898936 | 577256  | 39.631  | 33.842   |
| Total |           | 27500901 | 1705734 | 100.000 | 100.000  |

**3q iPrOH/Hex 1/9 IC**

<Chromatogram>

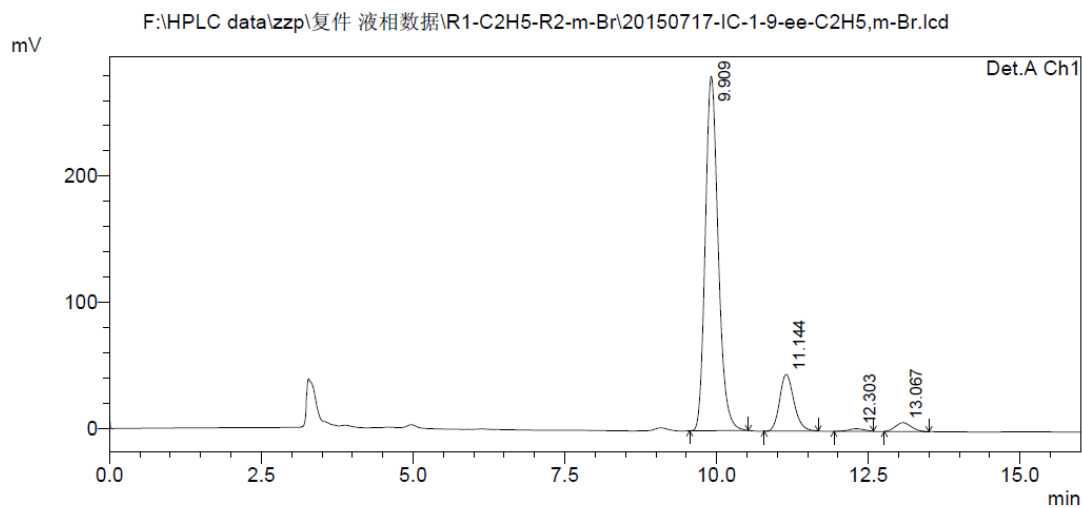

PeakTable

| Peak# | Ret. Time | Area    | Height | Area %  | Height % |
|-------|-----------|---------|--------|---------|----------|
| 1     | 9.909     | 4166280 | 280854 | 82.282  | 83.856   |
| 2     | 11.144    | 736488  | 45048  | 14.545  | 13.450   |
| 3     | 12.303    | 34033   | 2040   | 0.672   | 0.609    |
| 4     | 13.067    | 126630  | 6981   | 2.501   | 2.084    |
| Total |           | 5063430 | 334924 | 100.000 | 100.000  |

**Compound 3r:** 2-(1-(4-bromophenyl)-2-nitroethyl)-2-ethylbenzofuran-3(2H)-one

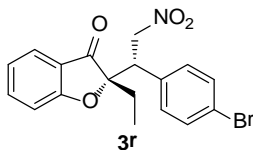

**Compound 3r:** Colorless oil, 92% isolated yield.

**<sup>1</sup>H NMR** (400 MHz, CDCl<sub>3</sub>) δ 7.73 – 7.27 (m, 5H), 7.26 – 6.93 (m, 3H), 4.69 (dd, *J* = 13.1, 11.4 Hz, 1H), 4.38 (dd, *J* = 13.1, 4.1 Hz, 1H), 4.00 (dd, *J* = 11.5, 4.0 Hz, 1H), 2.11 – 1.61 (m, 2H), 0.66 (t, *J* = 7.4 Hz, 3H).

**<sup>13</sup>C NMR** (100 MHz, CDCl<sub>3</sub>) δ 202.42 , 172.19 , 139.22 , 138.72 , 133.63 , 132.74 , 132.06 , 131.11 , 130.97 , 124.43 , 122.77 , 121.67 , 113.31 , 92.67 , 75.54 , 48.96 , 28.89 , 6.98 .

**HRMS (ESI)** calcd for C<sub>18</sub>H<sub>16</sub>BrNO<sub>4</sub> (M+Na)<sup>+</sup>: 412.0160, found: 412.0159.

**HPLC** The enantiomeric excess was determined by HPLC with an OD-H column at 210 nm (2-propanol: hexane=1:9), 1.0 mL/min; major isomer: *t*<sub>1</sub> = 11.25 min, *t*<sub>2</sub> = 16.48 min; minor isomer: *t*<sub>3</sub> = 13.78 min, *t*<sub>4</sub> = 15.54 min).

**[α]<sub>D</sub><sup>25</sup>** -232.3 (c = 1.0, CHCl<sub>3</sub>)



NMR copies of major product of compound **3r**:

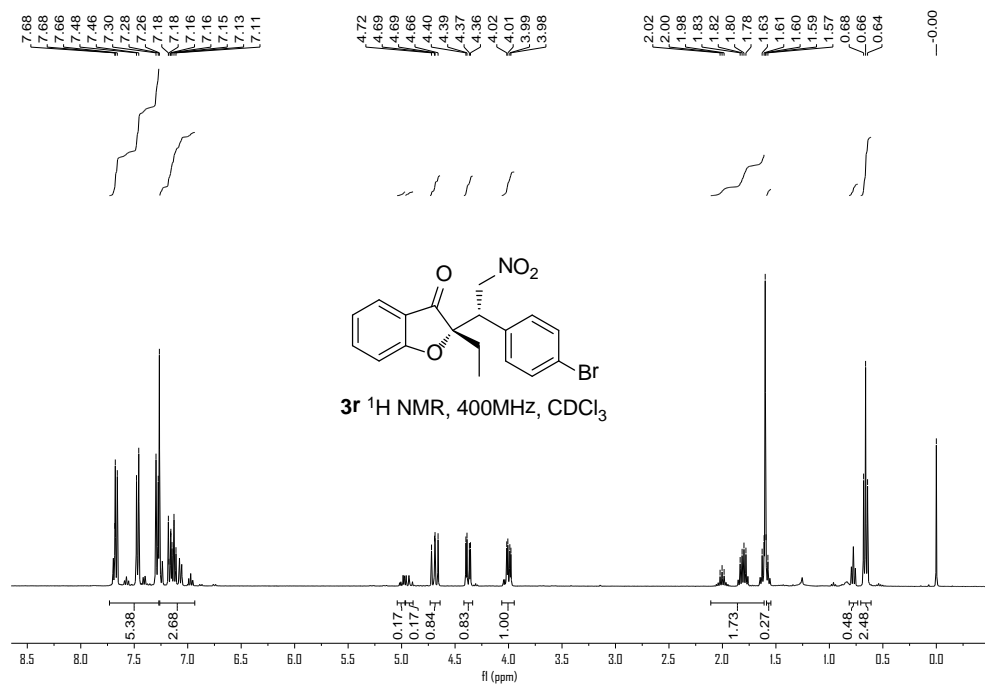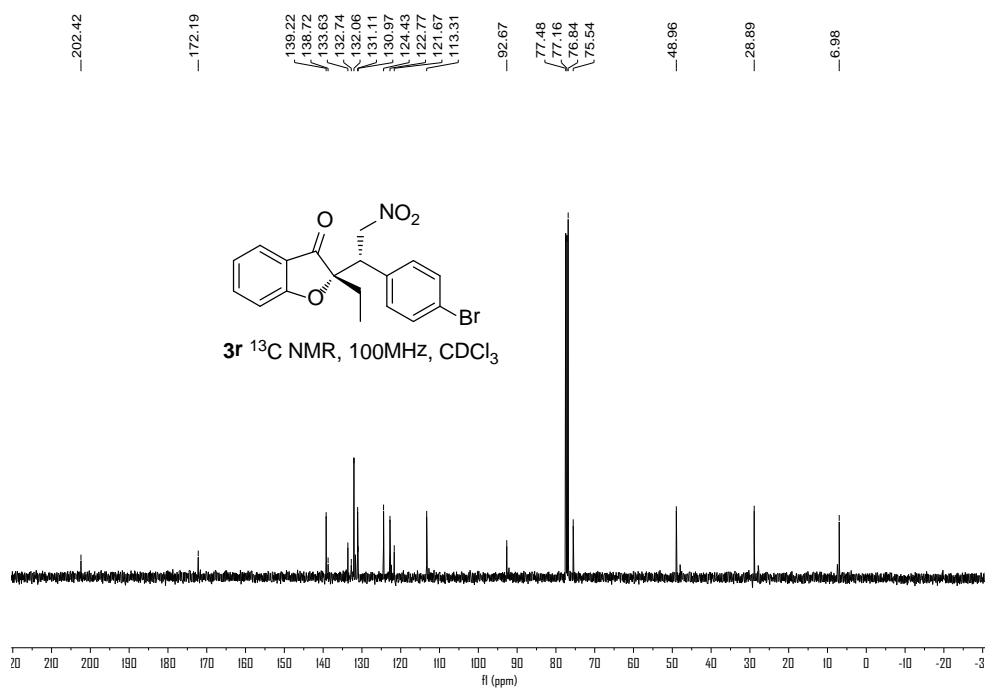

HPLC copies of compound **3r**:

**rac iPrOH/Hex 1/9 OD-H**

<Chromatogram>

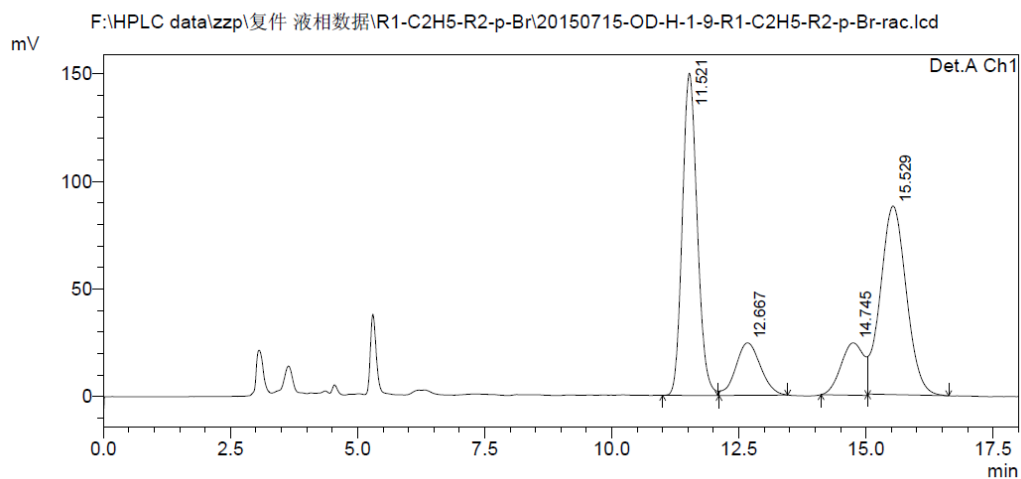

PeakTable

| Peak# | Ret. Time | Area    | Height | Area %  | Height % |
|-------|-----------|---------|--------|---------|----------|
| 1     | 11.521    | 3059559 | 149776 | 39.343  | 52.349   |
| 2     | 12.667    | 823005  | 24352  | 10.583  | 8.511    |
| 3     | 14.745    | 767021  | 24324  | 9.863   | 8.502    |
| 4     | 15.529    | 3126998 | 87658  | 40.210  | 30.638   |
| Total |           | 7776583 | 286111 | 100.000 | 100.000  |

**3r iPrOH/Hex 1/9 OD-H**

<Chromatogram>

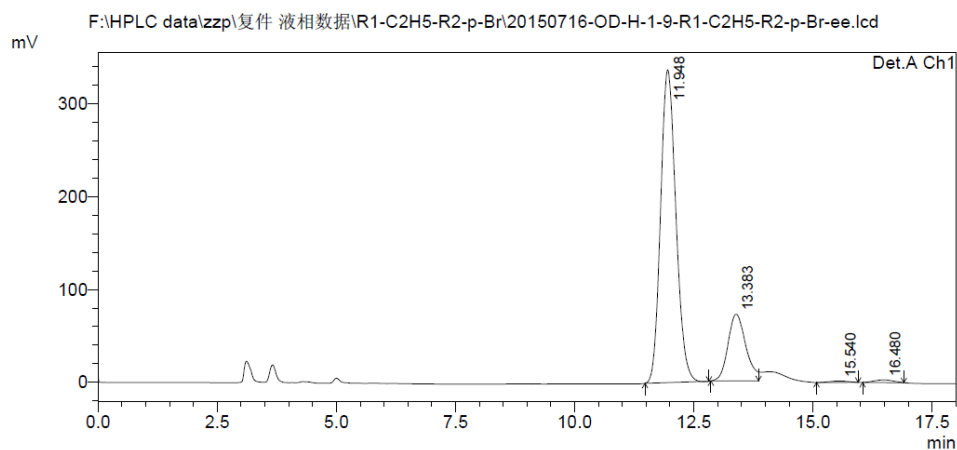

PeakTable

| Peak# | Ret. Time | Area    | Height | Area %  | Height % |
|-------|-----------|---------|--------|---------|----------|
| 1     | 11.948    | 7529892 | 336863 | 79.199  | 81.572   |
| 2     | 13.383    | 1857649 | 71737  | 19.539  | 17.371   |
| 3     | 15.540    | 40676   | 1528   | 0.428   | 0.370    |
| 4     | 16.480    | 79388   | 2836   | 0.835   | 0.687    |
| Total |           | 9507605 | 412964 | 100.000 | 100.000  |

#### Details for the transformation of the conjugate adduct:

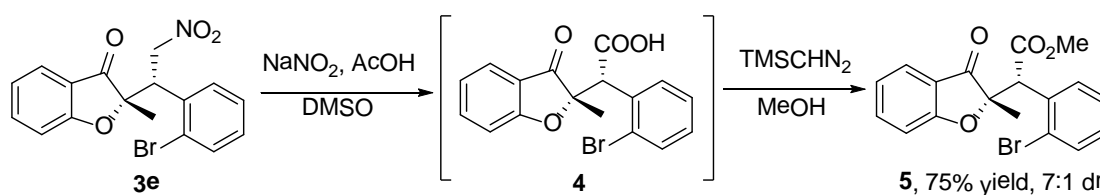

**3e** (1.0 mmol) was dissolved in  $\text{DMSO}$  (2.5 mL) at room temperature,  $\text{NaNO}_2$  (3 equiv.) was added, followed by the addition of acetic acid (10 equiv.). The resulting mixture was heated to  $40^\circ\text{C}$  and then stirred at that temperature for 16 h. Aqueous  $\text{HCl}$  solution (1N, 10 mL) was added to the mixture, and the resulting mixture was extracted with ethyl acetate (30 mL x 3). The combined organic phases were washed with brine, dried over anhydrous  $\text{Na}_2\text{SO}_4$ , concentrated and purified by column chromatography (hexane/ethyl acetate = 2:1) to afford acid **4** as a light yellow oil (70% yield). **4** (0.23 mmol) was dissolved in  $\text{MeOH}$  (2 mL) and the resulting solution was cooled down to  $0^\circ\text{C}$ . Then  $\text{TMSCHN}_2$  (1.15 mL, 2M solution in hexane, 10 equiv.) was added in portions (100  $\mu\text{L}$  every 15 min, 12 times). The reaction mixture was diluted with ethyl acetate (10 mL) and water (10 mL). The organic layer was separated and the aqueous layer was extracted with ethyl acetate (10 mL x 2). The combined organic phases were washed with brine and dried over anhydrous  $\text{Na}_2\text{SO}_4$ , filtered and concentrated. And the residue was purified by column chromatography (hexane/ethylacetate = 6:1) to afford the methyl ester **5** as a light yellow oil (75% yield, 7:1 dr).

**Compound 5:** methyl 2-(2-bromophenyl)-2-(2-methyl-3-oxo-2,3-dihydrobenzofuran-2-yl)acetate

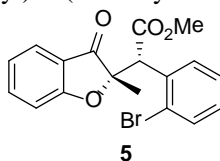

$^1\text{H NMR}$  (400 MHz,  $\text{CDCl}_3$ )  $\delta$  7.77 (dd,  $J = 7.7, 0.8$  Hz, 2H), 7.68 – 7.59 (m, 2H), 7.40 (d,  $J = 1.3$  Hz, 1H), 7.23 (dd,  $J = 1.7, 0.7$  Hz, 1H), 7.16 – 7.08 (m, 2H), 5.05 (d,  $J = 29.0$  Hz, 1H), 3.43 (s, 3H), 1.20 (s, 3H).

$^{13}\text{C NMR}$  (100 MHz,  $\text{CDCl}_3$ )  $\delta$  202.62, 170.88, 169.98, 137.68, 134.31, 133.11, 131.63, 129.76, 127.85, 126.55, 124.77, 122.08, 120.99, 113.35, 88.97, 54.97, 52.44, 21.09.

**HRMS (ESI)** calcd for  $\text{C}_{18}\text{H}_{15}\text{BrO}_4$  ( $\text{M}+\text{H}$ ) $^+$ : 375.0220, found: 375.0226.

$[\alpha]_{\text{D}}^{25} +13.6$  ( $c = 0.8$ ,  $\text{CHCl}_3$ ).

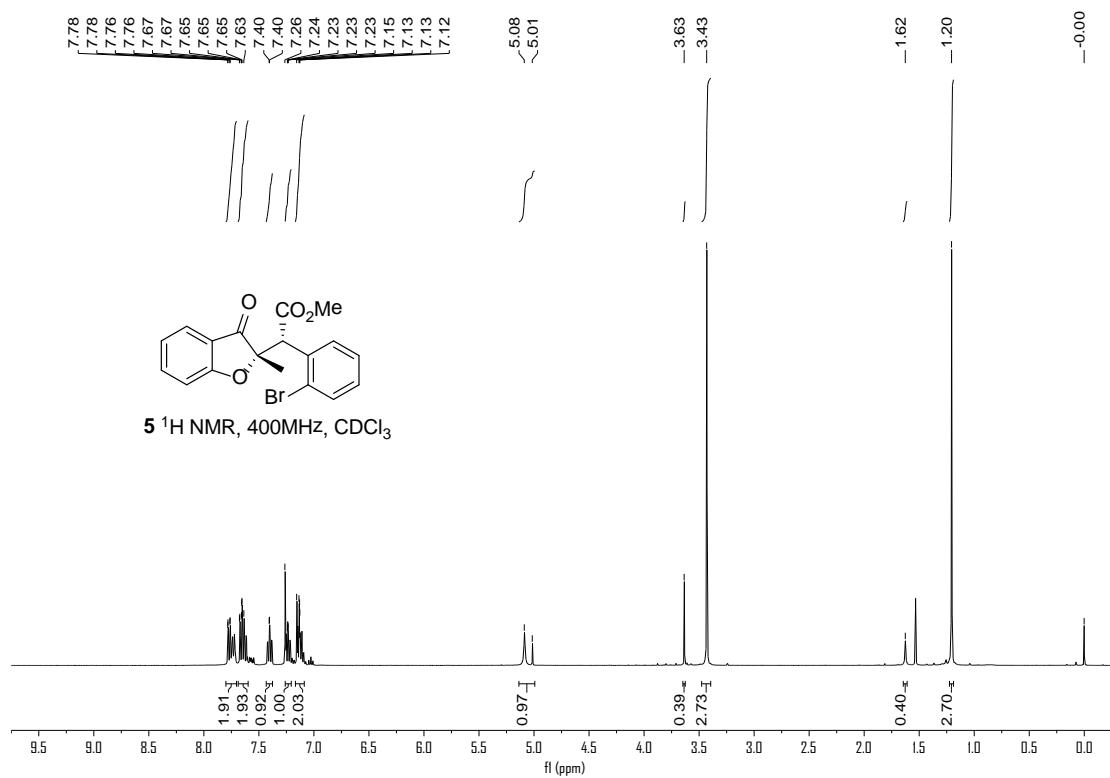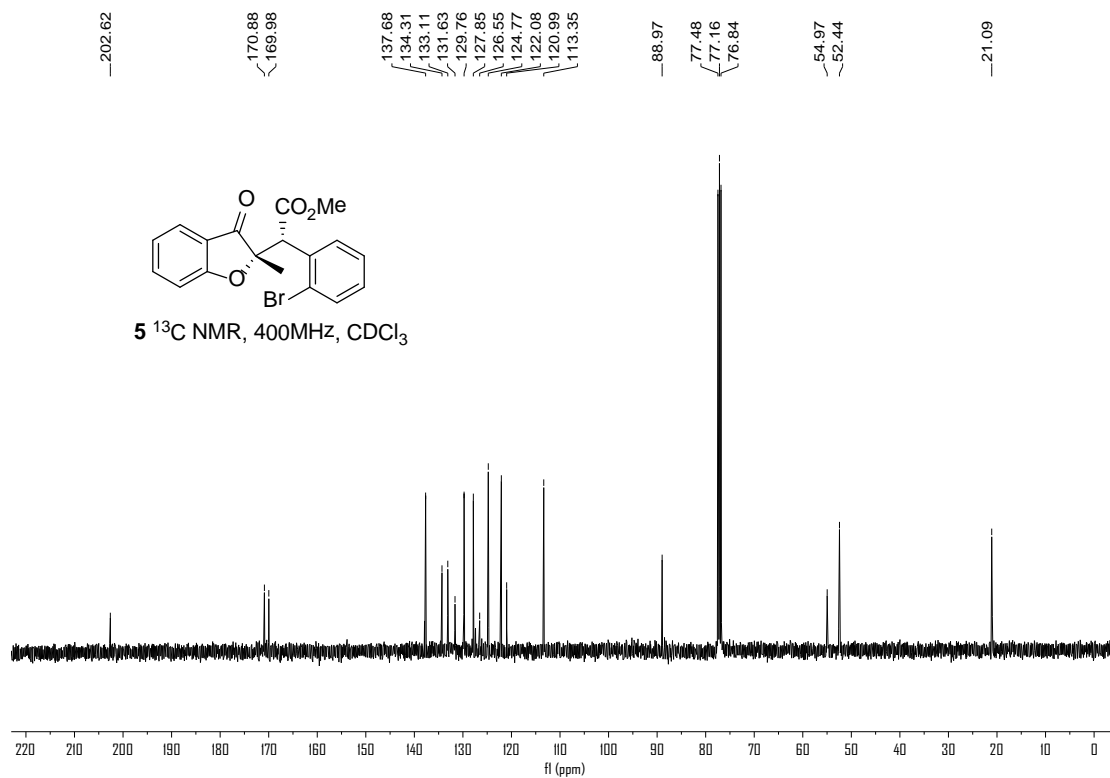

4. X-ray crystallography data of 3p.

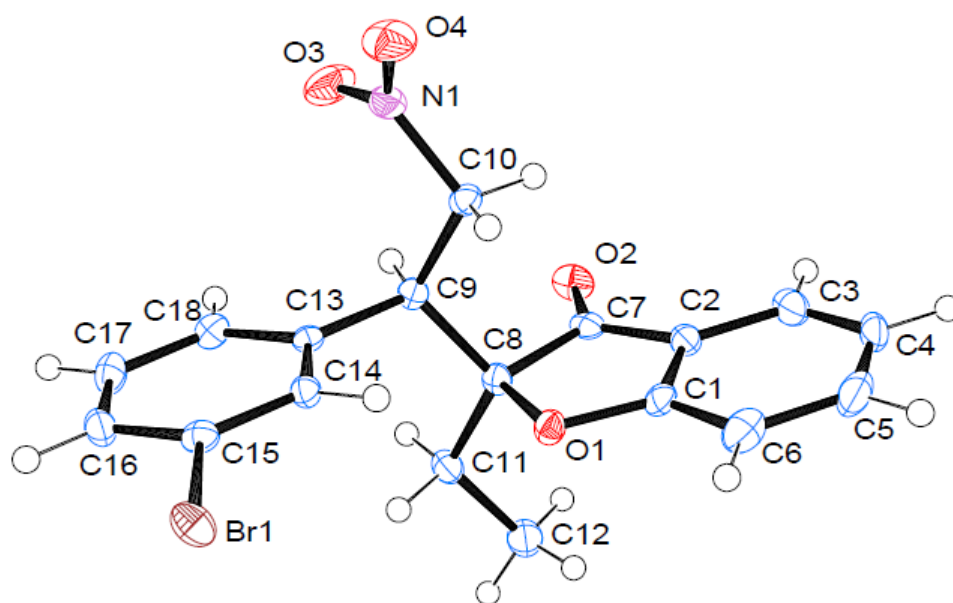

Figure S1 X-ray crystallography data of 3q.

Table 1. Crystal data and structure refinement for shelxl.

|                                   |                                                                                                                    |
|-----------------------------------|--------------------------------------------------------------------------------------------------------------------|
| Identification code               | shelxl                                                                                                             |
| Empirical formula                 | C <sub>18</sub> H <sub>16</sub> Br N O <sub>4</sub>                                                                |
| Formula weight                    | 390.23                                                                                                             |
| Temperature                       | 113(2) K                                                                                                           |
| Wavelength                        | 0.71075 Å                                                                                                          |
| Crystal system, space group       | Monoclinic, P2(1)                                                                                                  |
| Unit cell dimensions              | a = 9.528(3) Å    alpha = 90 deg.<br>b = 7.509(2) Å    beta = 99.729(7) deg.<br>c = 11.706(4) Å    gamma = 90 deg. |
| Volume                            | 825.5(4) Å <sup>3</sup>                                                                                            |
| Z, Calculated density             | 2, 1.570 Mg/m <sup>3</sup>                                                                                         |
| Absorption coefficient            | 2.512 mm <sup>-1</sup>                                                                                             |
| F(000)                            | 396                                                                                                                |
| Crystal size                      | 0.220 x 0.200 x 0.160 mm                                                                                           |
| Theta range for data collection   | 1.765 to 28.754 deg.                                                                                               |
| Limiting indices                  | -11<=h<=12, -10<=k<=10, -15<=l<=15                                                                                 |
| Reflections collected / unique    | 11465 / 4145 [R(int) = 0.0246]                                                                                     |
| Completeness to theta = 25.242    | 99.9 %                                                                                                             |
| Absorption correction             | Semi-empirical from equivalents                                                                                    |
| Max. and min. transmission        | 0.668 and 0.564                                                                                                    |
| Refinement method                 | Full-matrix least-squares on F <sup>2</sup>                                                                        |
| Data / restraints / parameters    | 4145 / 1 / 218                                                                                                     |
| Goodness-of-fit on F <sup>2</sup> | 0.874                                                                                                              |
| Final R indices [I>2sigma(I)]     | R1 = 0.0197, wR2 = 0.0366                                                                                          |
| R indices (all data)              | R1 = 0.0225, wR2 = 0.0368                                                                                          |
| Absolute structure parameter      | -0.002(3)                                                                                                          |
| Extinction coefficient            | n/a                                                                                                                |
| Largest diff. peak and hole       | 0.581 and -0.360 e.Å <sup>-3</sup>                                                                                 |

## 5. Reference

1. (a) C. -Y. Lee, E. -H. Chew, M. -L. Go, *Eur. J. Med. Chem.* 2010, **45**, 2957; (b) M. Morimoto, H. Fukumoto, T. Nozoe, A. Hagiwara and K. Komai, *J. Agric. Food Chem.*, 2007, **55**, 700.
2. X. Li, X.-S. Xue, C. Liu, B. Wang, B.-X. Tan, J.-L. Jin, Y.-Y. Zhang, N. Dong and J.-P. Cheng, *Org. Biomol. Chem.*, 2012, **10**, 413.
